# Supplementary material
Source: Royal Society of Chemistry journal article supplement (doi:10.1039/d5cp04994f)
Supplement: d5cp04994f1.pdf [file d5cp04994f1.pdf]

## Supporting Information

### Computational Insights into the Diverse Mechanisms in Cytochrome P450 2D6-Mediated Primaquine Metabolism

Hongguo Zhang<sup>a</sup>, Qingchuan Zheng<sup>\*a,b</sup>

<sup>a</sup> Institute of Frontier Medical Science, School of Pharmaceutical Sciences,  
Jilin University, Changchun, 130021, China

<sup>b</sup> Institute of Theoretical Chemistry, College of Chemistry, Jilin University,  
Changchun, 130023, China.

\*Corresponding author

E-mail address: zhengqc@jlu.edu.cn (Qingchuan Zheng)

**Table S1.** Binding free energy and its components (kcal·mol<sup>-1</sup>).

| Systems                 | PQ-CYP2D6 |
|-------------------------|-----------|
| $\Delta E_{vdW}$        | -37.81    |
| $\Delta E_{ele}$        | -6.40     |
| $\Delta G_{GB}$         | 20.63     |
| $\Delta G_{SA}$         | -5.08     |
| $\Delta G_{polar}^a$    | 14.23     |
| $\Delta G_{nonpolar}^b$ | -42.89    |
| $\Delta G_{mmgbsa}^c$   | -28.66    |
| $-T\Delta S$            | 5.93      |
| $\Delta G_{bind}^d$     | -8.77     |

<sup>a</sup>  $\Delta G_{polar} = \Delta E_{ele} + \Delta G_{GB}$ . <sup>b</sup>  $\Delta G_{nonpolar} = \Delta E_{vdW} + \Delta G_{SA}$ .

<sup>c</sup>  $\Delta G_{mmgbsa} = \Delta G_{polar} + \Delta G_{nonpolar}$ . <sup>d</sup>  $\Delta G_{bind} = \Delta G_{mmgbsa} - T\Delta S$ .

**Table S2.** Cartesian coordinates of the first model for analyzing ESP.

|   |             |             |             |
|---|-------------|-------------|-------------|
| N | 1.25500000  | -2.31100000 | 0.13400000  |
| C | 1.75500000  | 4.01600000  | -0.33300000 |
| O | 2.73600000  | 2.99400000  | -0.35800000 |
| N | -0.68200000 | -0.45000000 | 0.08800000  |
| C | 2.33400000  | 1.69400000  | -0.24500000 |
| N | -5.65300000 | -0.73500000 | -1.52000000 |
| C | 0.97400000  | 1.32800000  | -0.10400000 |
| C | 0.61000000  | -0.01200000 | 0.00100000  |
| C | 1.64300000  | -1.01800000 | -0.00800000 |
| C | 3.00600000  | -0.61900000 | -0.15300000 |
| C | 2.18300000  | -3.24900000 | 0.12600000  |
| C | 3.56200000  | -2.97100000 | -0.02500000 |
| C | 3.96800000  | -1.66400000 | -0.16100000 |
| C | 3.34100000  | 0.74600000  | -0.27400000 |
| C | -1.82000000 | 0.38800000  | 0.43300000  |
| C | -1.75900000 | 0.86100000  | 1.89300000  |
| C | -3.09900000 | -0.39400000 | 0.10600000  |
| C | -4.39200000 | 0.40800000  | 0.27900000  |
| C | -5.64700000 | -0.38400000 | -0.09500000 |
| H | 1.19900000  | 4.02400000  | 0.61300000  |
| H | 2.29900000  | 4.95600000  | -0.43600000 |
| H | 1.04500000  | 3.91900000  | -1.16400000 |
| H | -0.74300000 | -1.44300000 | 0.28400000  |
| H | -4.98100000 | -1.47800000 | -1.69600000 |
| H | -6.56000000 | -1.11500000 | -1.77600000 |
| H | 0.20800000  | 2.08900000  | -0.09000000 |
| H | 1.84300000  | -4.27600000 | 0.24400000  |
| H | 4.27900000  | -3.78500000 | -0.02700000 |
| H | 5.01900000  | -1.41400000 | -0.27300000 |
| H | -1.79600000 | 1.26700000  | -0.22500000 |
| H | -0.79300000 | 1.32700000  | 2.10400000  |
| H | -2.54300000 | 1.59100000  | 2.11300000  |
| H | -1.88000000 | 0.01000000  | 2.57200000  |
| H | -3.13700000 | -1.29100000 | 0.74300000  |
| H | -3.01400000 | -0.73900000 | -0.93000000 |
| H | -4.35000000 | 1.30700000  | -0.34800000 |
| H | -4.49100000 | 0.73800000  | 1.31900000  |
| H | -5.73400000 | -1.25500000 | 0.58100000  |
| H | -6.52500000 | 0.24300000  | 0.09300000  |
| H | 4.37200000  | 1.06200000  | -0.38200000 |

**Table S3.** Cartesian coordinates of the second model for analyzing ESP.

|   |             |             |             |
|---|-------------|-------------|-------------|
| C | 0.18500000  | 0.40000000  | 7.00400000  |
| C | -0.06300000 | -0.25000000 | 5.65800000  |
| C | -0.61100000 | 0.51400000  | 4.60500000  |
| C | 0.23700000  | -1.63200000 | 5.48200000  |
| C | -0.84700000 | -0.12200000 | 3.40000000  |
| C | 0.07700000  | -2.23300000 | 4.19200000  |
| C | -0.47800000 | -1.45000000 | 3.19300000  |
| H | -0.86300000 | 1.55900000  | 4.75800000  |
| H | 0.64400000  | -2.19700000 | 6.31500000  |
| H | -1.27900000 | 0.42500000  | 2.56900000  |
| H | 0.35100000  | -3.26900000 | 4.02000000  |
| H | -0.63400000 | -1.87000000 | 2.20400000  |
| C | 6.46900000  | 4.87800000  | -2.38100000 |
| C | 4.98900000  | 4.77000000  | -1.88100000 |
| H | 7.05200000  | 4.01200000  | -2.05400000 |
| H | 4.50800000  | 3.86900000  | -2.27200000 |
| H | 4.94800000  | 4.72600000  | -0.78800000 |
| H | 4.40000000  | 5.63200000  | -2.20900000 |
| N | -0.86200000 | 7.66500000  | 0.58300000  |
| C | 0.29000000  | 7.02900000  | -0.17100000 |
| C | -0.17500000 | 5.75100000  | -0.82300000 |
| O | 0.09900000  | 5.46300000  | -1.97900000 |
| C | 1.55500000  | 6.81900000  | 0.60600000  |
| O | 1.79000000  | 7.95000000  | 1.44200000  |
| H | -0.53100000 | 8.57600000  | 0.89700000  |
| H | 0.55600000  | 7.66100000  | -1.02900000 |
| H | 1.50900000  | 5.89900000  | 1.20700000  |
| H | 2.39500000  | 6.72500000  | -0.08500000 |
| H | 1.21000000  | 7.85200000  | 2.20700000  |
| N | -1.12500000 | 5.01700000  | -0.18700000 |
| C | -1.81500000 | 3.87200000  | -0.78000000 |
| C | -2.70500000 | 4.20100000  | -1.95400000 |
| O | -2.50800000 | 3.64300000  | -3.06500000 |
| C | -2.52600000 | 3.11400000  | 0.30400000  |
| H | -1.45900000 | 5.36900000  | 0.70200000  |
| H | -1.04500000 | 3.22500000  | -1.21200000 |
| H | -2.95800000 | 2.19100000  | -0.09100000 |
| H | -1.81000000 | 2.83400000  | 1.07700000  |
| H | -3.33800000 | 3.70100000  | 0.75100000  |
| C | -1.60000000 | 0.53900000  | -3.93500000 |
| H | -2.19100000 | 0.24900000  | -4.80700000 |
| H | -1.54700000 | 1.62500000  | -3.86300000 |

|   |             |             |             |
|---|-------------|-------------|-------------|
| H | -2.07400000 | 0.14800000  | -3.03100000 |
| C | -6.39100000 | -4.06500000 | -0.72200000 |
| S | -6.58200000 | -2.28900000 | -0.41600000 |
| C | 8.86800000  | -2.24200000 | -2.68800000 |
| C | 8.26800000  | -2.94700000 | -1.47100000 |
| C | 6.87700000  | -3.09800000 | -1.30700000 |
| C | 9.11700000  | -3.61800000 | -0.62300000 |
| C | 6.40400000  | -3.82300000 | -0.24300000 |
| C | 8.65300000  | -4.30600000 | 0.51800000  |
| C | 7.28600000  | -4.44300000 | 0.68100000  |
| H | 6.18700000  | -2.62300000 | -1.99900000 |
| H | 10.19000000 | -3.54000000 | -0.78500000 |
| H | 5.33100000  | -3.92100000 | -0.10100000 |
| H | 9.35400000  | -4.77500000 | 1.20100000  |
| H | 6.87600000  | -4.99200000 | 1.52300000  |
| C | 4.05200000  | -1.10800000 | -4.88900000 |
| C | 4.70500000  | -0.14300000 | -3.88000000 |
| H | 4.25300000  | 0.85200000  | -3.93200000 |
| H | 4.57400000  | -0.51000000 | -2.85700000 |
| H | 5.77800000  | -0.03200000 | -4.07000000 |
| N | -3.53800000 | -3.12400000 | 0.05400000  |
| N | -4.47700000 | -1.60000000 | -2.17700000 |
| N | -4.39800000 | -1.08100000 | 1.83500000  |
| C | -3.54800000 | -3.28500000 | 2.52100000  |
| C | -3.22900000 | -3.75200000 | -2.31300000 |
| C | -5.66100000 | 0.47000000  | -2.90600000 |
| C | -5.28000000 | 1.20300000  | 1.99900000  |
| C | -3.28200000 | -3.77400000 | 1.24500000  |
| C | -3.90100000 | -2.65500000 | -2.87000000 |
| C | -5.73700000 | 1.01800000  | -1.59700000 |
| C | -4.74800000 | 0.04700000  | 2.54500000  |
| C | -2.65100000 | -5.04500000 | 0.98400000  |
| C | -4.12600000 | -2.48200000 | -4.28300000 |
| C | -6.27500000 | 2.32300000  | -1.30400000 |
| C | -4.56000000 | -0.16900000 | 3.95900000  |
| C | -2.51000000 | -5.15100000 | -0.36600000 |
| C | -4.83000000 | -1.32600000 | -4.44700000 |
| C | -6.15800000 | 2.53100000  | 0.04100000  |
| C | -4.12000000 | -1.44600000 | 4.10600000  |
| C | -3.08000000 | -3.95800000 | -0.94300000 |
| C | -5.03800000 | -0.75600000 | -3.14100000 |
| C | -5.55100000 | 1.35500000  | 0.61500000  |
| C | -4.01500000 | -2.00400000 | 2.77900000  |
| N | -5.30600000 | 0.44000000  | -0.40300000 |

|   |             |             |             |
|---|-------------|-------------|-------------|
| F | -4.28600000 | -1.26800000 | -0.18000000 |
| H | -3.28700000 | -3.91000000 | 3.36700000  |
| H | -2.82900000 | -4.49600000 | -2.99200000 |
| H | -6.04000000 | 1.04800000  | -3.73800000 |
| H | -5.53300000 | 2.02800000  | 2.65400000  |
| N | 2.86700000  | -2.14900000 | -1.26200000 |
| C | 1.18700000  | 2.98000000  | 2.12400000  |
| O | 0.42900000  | 2.10700000  | 1.30900000  |
| N | 4.40600000  | -0.48800000 | 0.21600000  |
| C | 1.06300000  | 1.05200000  | 0.69800000  |
| N | 8.98000000  | -1.48100000 | 2.50200000  |
| C | 2.46000000  | 0.85900000  | 0.78700000  |
| C | 3.06700000  | -0.21900000 | 0.14600000  |
| C | 2.24600000  | -1.12400000 | -0.61800000 |
| C | 0.83500000  | -0.90700000 | -0.67300000 |
| C | 2.12100000  | -2.98900000 | -1.96000000 |
| C | 0.71300000  | -2.88100000 | -2.05800000 |
| C | 0.07200000  | -1.84600000 | -1.41900000 |
| C | 0.24800000  | 0.19400000  | -0.01300000 |
| C | 5.42300000  | 0.45400000  | 0.66300000  |
| C | 5.55600000  | 1.64200000  | -0.30100000 |
| C | 6.73500000  | -0.31800000 | 0.83800000  |
| C | 7.87800000  | 0.47900000  | 1.46700000  |
| C | 9.16300000  | -0.34400000 | 1.59300000  |
| H | 1.97900000  | 3.48300000  | 1.55500000  |
| H | 0.48400000  | 3.73000000  | 2.49100000  |
| H | 1.63200000  | 2.45200000  | 2.97600000  |
| H | 4.69600000  | -1.25300000 | -0.37900000 |
| H | 8.43900000  | -2.20500000 | 2.03400000  |
| H | 9.88400000  | -1.90600000 | 2.69500000  |
| H | 3.06800000  | 1.54000000  | 1.36400000  |
| H | 2.64400000  | -3.79400000 | -2.47200000 |
| H | 0.15500000  | -3.61000000 | -2.63700000 |
| H | -1.00500000 | -1.72100000 | -1.46300000 |
| H | 5.11800000  | 0.83100000  | 1.65000000  |
| H | 4.58300000  | 2.10100000  | -0.48500000 |
| H | 6.22300000  | 2.41200000  | 0.09800000  |
| H | 5.95500000  | 1.30300000  | -1.26300000 |
| H | 7.05300000  | -0.68900000 | -0.14400000 |
| H | 6.52300000  | -1.20100000 | 1.44900000  |
| H | 7.58400000  | 0.82600000  | 2.46500000  |
| H | 8.09600000  | 1.36800000  | 0.86200000  |
| H | 9.49400000  | -0.64000000 | 0.58100000  |
| H | 9.95100000  | 0.29400000  | 2.00900000  |

|   |             |             |             |
|---|-------------|-------------|-------------|
| H | -5.81400000 | -4.54200000 | 0.07200000  |
| H | -7.37900000 | -4.52000000 | -0.81000000 |
| H | -5.85700000 | -4.20500000 | -1.66800000 |
| H | -4.75200000 | 0.57100000  | 4.72400000  |
| H | -6.46100000 | 3.40100000  | 0.60700000  |
| H | -6.68800000 | 2.99300000  | -2.04600000 |
| H | -5.16800000 | -0.87500000 | -5.36900000 |
| H | -3.77900000 | -3.16500000 | -5.04600000 |
| H | -2.07600000 | -5.96200000 | -0.93600000 |
| H | -2.34800000 | -5.74700000 | 1.75000000  |
| H | -3.85400000 | -1.97100000 | 5.01200000  |
| H | 1.02100000  | 1.10900000  | 6.95400000  |
| H | -0.69100000 | 0.96200000  | 7.34600000  |
| H | 0.43000000  | -0.34100000 | 7.77000000  |
| H | 8.88700000  | -2.91500000 | -3.55300000 |
| H | 8.28000000  | -1.36400000 | -2.97200000 |
| H | 9.89300000  | -1.91900000 | -2.48900000 |
| H | 2.98600000  | -1.23200000 | -4.67200000 |
| H | 4.51500000  | -2.09900000 | -4.84200000 |
| H | 6.95000000  | 5.77900000  | -1.99000000 |
| H | 4.14800000  | -0.74100000 | -5.91500000 |
| H | 6.50800000  | 4.92000000  | -3.47300000 |
| H | -1.59500000 | 7.84500000  | -0.09800000 |
| O | -2.84300000 | -0.54600000 | -0.32800000 |
| H | -0.82300000 | 0.34700000  | -0.05900000 |
| H | -0.59500000 | 0.11700000  | -4.01900000 |
| H | -3.52300000 | 4.93400000  | -1.81300000 |

**Table S4.** The imaginary frequencies of the transition states (TS) in the QM calculation

| <b>TS</b> | <b>Imaginary Frequency</b> |
|-----------|----------------------------|
| TS1       | -1350.32                   |
| TS2       | -509.38                    |
| TS3       | -1884.27                   |
| TS4       | -264.53                    |
| TS5       | -893.38                    |

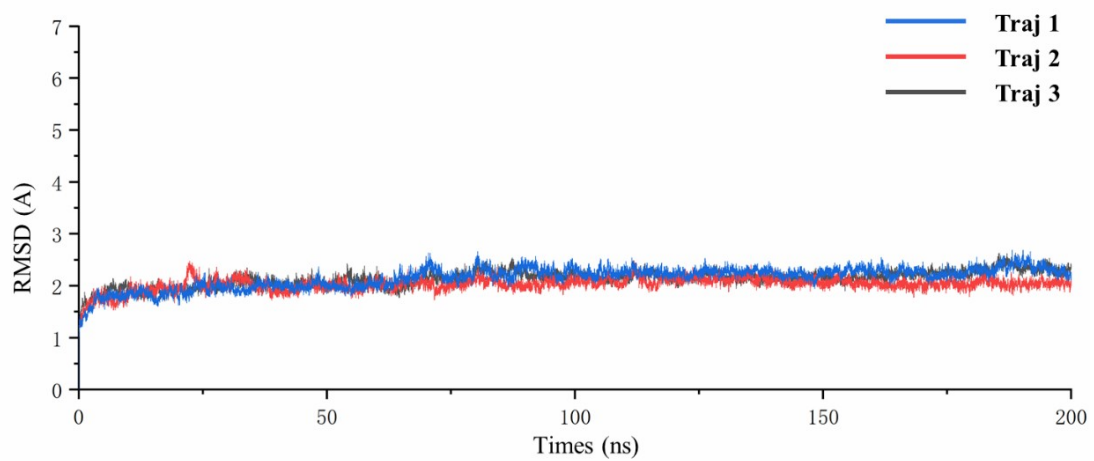

**Figure S1.** RMSDs of the protein backbone atoms in all trajectories.

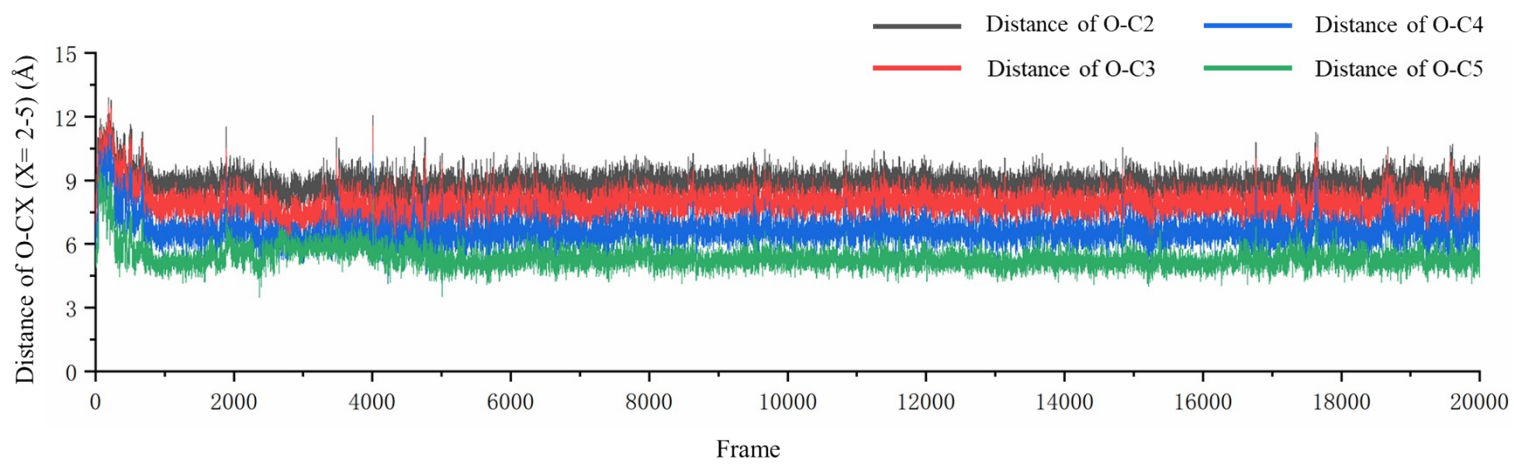

**Figure S2.** The distances of O-CX ( $X = 2-5$ ).

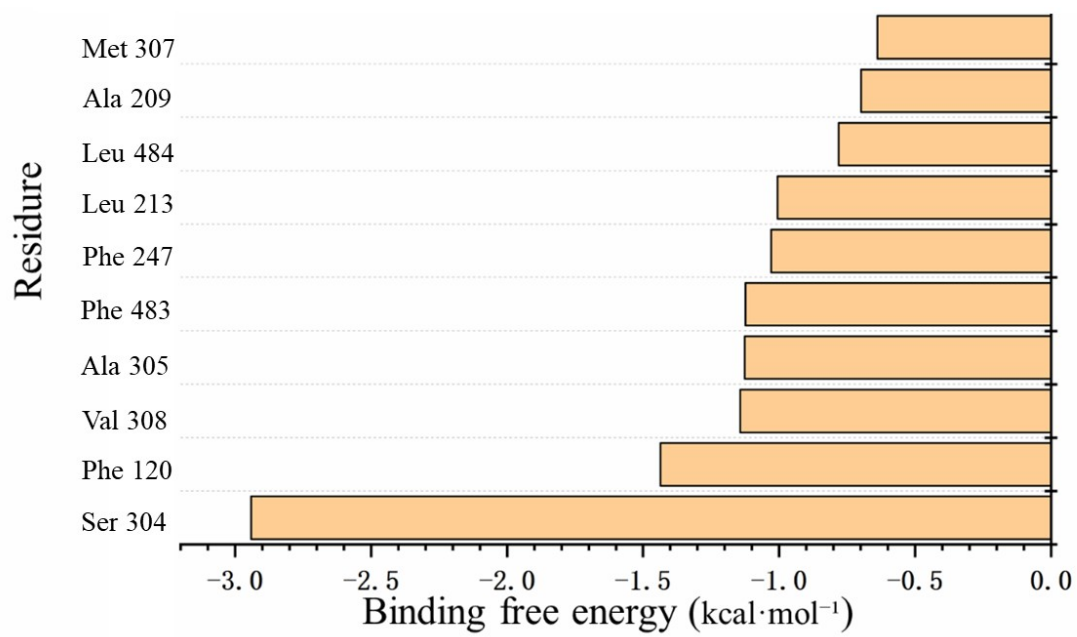

**Figure S3.** Decomposition of binding free energy on per-residue.

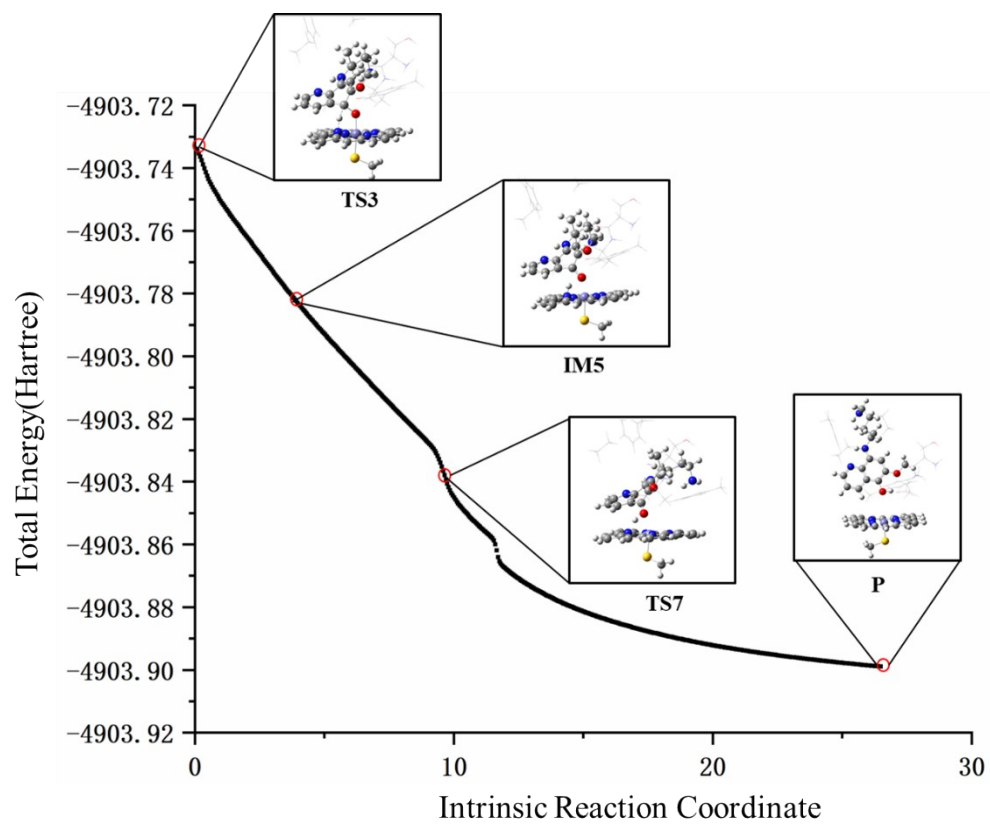

**Figure S4.** The IRC of TS3.

## Cartesian coordinates of all structures in the QM calculation

|   |             |             |             |
|---|-------------|-------------|-------------|
| R |             |             |             |
| C | 0.18518000  | 0.40043500  | 7.00404600  |
| C | -0.06311900 | -0.24968300 | 5.65775200  |
| C | -0.61057400 | 0.51396500  | 4.60529000  |
| C | 0.23652500  | -1.63215000 | 5.48171500  |
| C | -0.84658800 | -0.12162100 | 3.39951900  |
| C | 0.07719500  | -2.23303700 | 4.19243500  |
| C | -0.47769700 | -1.45035400 | 3.19315800  |
| H | -0.86336900 | 1.55881600  | 4.75801100  |
| H | 0.64374700  | -2.19714700 | 6.31459100  |
| H | -1.27942800 | 0.42535000  | 2.56906700  |
| H | 0.35061600  | -3.26854200 | 4.02044400  |
| H | -0.63443100 | -1.87026000 | 2.20369000  |
| C | 6.46858400  | 4.87825100  | -2.38088200 |
| C | 4.98854100  | 4.76966100  | -1.88058200 |
| H | 7.05228100  | 4.01213500  | -2.05423400 |
| H | 4.50800800  | 3.86895200  | -2.27170200 |
| H | 4.94841100  | 4.72551100  | -0.78805600 |
| H | 4.40007300  | 5.63206000  | -2.20880900 |
| N | -0.86235900 | 7.66536200  | 0.58302700  |
| C | 0.28995400  | 7.02899700  | -0.17083400 |
| C | -0.17522500 | 5.75092900  | -0.82310400 |
| O | 0.09891000  | 5.46284100  | -1.97850900 |
| C | 1.55499200  | 6.81895200  | 0.60604700  |
| O | 1.79032800  | 7.95029000  | 1.44157400  |
| H | -0.53129500 | 8.57563800  | 0.89664000  |
| H | 0.55582100  | 7.66109300  | -1.02885000 |
| H | 1.50895100  | 5.89882800  | 1.20733400  |
| H | 2.39501500  | 6.72466900  | -0.08465500 |
| H | 1.20968500  | 7.85247100  | 2.20682900  |
| N | -1.12517500 | 5.01748100  | -0.18706800 |
| C | -1.81481900 | 3.87240700  | -0.77979000 |
| C | -2.70456700 | 4.20060600  | -1.95363300 |
| O | -2.50826700 | 3.64335200  | -3.06542800 |
| C | -2.52649300 | 3.11400000  | 0.30350500  |
| H | -1.45932600 | 5.36946000  | 0.70200600  |
| H | -1.04474500 | 3.22532200  | -1.21159700 |
| H | -2.95781500 | 2.19077800  | -0.09125000 |

|   |             |             |             |
|---|-------------|-------------|-------------|
| H | -1.80952600 | 2.83360600  | 1.07700400  |
| H | -3.33814000 | 3.70120000  | 0.75133800  |
| C | -1.59967900 | 0.53884300  | -3.93507300 |
| H | -2.19126700 | 0.24901100  | -4.80668000 |
| H | -1.54720900 | 1.62482000  | -3.86295100 |
| H | -2.07406300 | 0.14799300  | -3.03100500 |
| C | -6.39077800 | -4.06506400 | -0.72191000 |
| S | -6.58232300 | -2.28870900 | -0.41579200 |
| C | 8.86803200  | -2.24230100 | -2.68798300 |
| C | 8.26811300  | -2.94661200 | -1.47099300 |
| C | 6.87694700  | -3.09827800 | -1.30658600 |
| C | 9.11704300  | -3.61779100 | -0.62329100 |
| C | 6.40371000  | -3.82303200 | -0.24250100 |
| C | 8.65273400  | -4.30605000 | 0.51807700  |
| C | 7.28618100  | -4.44340500 | 0.68053600  |
| H | 6.18669000  | -2.62339100 | -1.99883400 |
| H | 10.18965500 | -3.54022400 | -0.78521700 |
| H | 5.33080000  | -3.92138500 | -0.10121200 |
| H | 9.35387200  | -4.77481500 | 1.20108900  |
| H | 6.87602800  | -4.99168700 | 1.52300800  |
| C | 4.05180000  | -1.10794100 | -4.88851700 |
| C | 4.70483500  | -0.14328000 | -3.87959500 |
| H | 4.25279000  | 0.85220200  | -3.93165700 |
| H | 4.57377600  | -0.51049600 | -2.85714700 |
| H | 5.77837800  | -0.03231500 | -4.07031900 |
| N | -3.53805300 | -3.12443500 | 0.05404700  |
| N | -4.47713400 | -1.60029000 | -2.17697200 |
| N | -4.39772700 | -1.08123600 | 1.83541100  |
| C | -3.54783100 | -3.28523500 | 2.52089100  |
| C | -3.22878700 | -3.75159900 | -2.31321500 |
| C | -5.66136600 | 0.46969200  | -2.90637800 |
| C | -5.28014900 | 1.20310500  | 1.99919400  |
| C | -3.28159300 | -3.77368100 | 1.24507100  |
| C | -3.90140700 | -2.65473500 | -2.86959800 |
| C | -5.73653700 | 1.01809100  | -1.59726300 |
| C | -4.74781500 | 0.04717300  | 2.54472800  |
| C | -2.65052900 | -5.04544800 | 0.98440900  |
| C | -4.12643000 | -2.48152100 | -4.28328100 |
| C | -6.27518700 | 2.32318500  | -1.30395600 |
| C | -4.55999400 | -0.16850700 | 3.95942000  |
| C | -2.50970200 | -5.15138600 | -0.36558000 |
| C | -4.82980500 | -1.32638900 | -4.44673200 |
| C | -6.15774600 | 2.53066800  | 0.04077100  |
| C | -4.12008500 | -1.44603000 | 4.10568500  |

|    |             |             |             |
|----|-------------|-------------|-------------|
| C  | -3.07997700 | -3.95819300 | -0.94276200 |
| C  | -5.03782900 | -0.75583500 | -3.14148400 |
| C  | -5.55064400 | 1.35536800  | 0.61548000  |
| C  | -4.01508900 | -2.00370900 | 2.77885800  |
| N  | -5.30574100 | 0.44041400  | -0.40339200 |
| Fe | -4.28599500 | -1.26813200 | -0.17983900 |
| H  | -3.28656200 | -3.91001100 | 3.36666500  |
| H  | -2.82906500 | -4.49587300 | -2.99150900 |
| H  | -6.04011300 | 1.04826200  | -3.73810300 |
| H  | -5.53306400 | 2.02802200  | 2.65383600  |
| N  | 2.86650800  | -2.14945600 | -1.26194600 |
| C  | 1.18707500  | 2.97957400  | 2.12352700  |
| O  | 0.42947500  | 2.10694700  | 1.30894300  |
| N  | 4.40586800  | -0.48839800 | 0.21643000  |
| C  | 1.06291400  | 1.05241800  | 0.69785300  |
| N  | 8.98004900  | -1.48106100 | 2.50223800  |
| C  | 2.45970800  | 0.85867500  | 0.78744700  |
| C  | 3.06672200  | -0.21881500 | 0.14551200  |
| C  | 2.24583800  | -1.12410900 | -0.61772000 |
| C  | 0.83491000  | -0.90719500 | -0.67323400 |
| C  | 2.12079200  | -2.98879500 | -1.95970600 |
| C  | 0.71292200  | -2.88085300 | -2.05825900 |
| C  | 0.07165000  | -1.84573500 | -1.41876200 |
| C  | 0.24804700  | 0.19369300  | -0.01256200 |
| C  | 5.42267800  | 0.45372500  | 0.66332900  |
| C  | 5.55627600  | 1.64155900  | -0.30056400 |
| C  | 6.73480600  | -0.31793200 | 0.83810300  |
| C  | 7.87770100  | 0.47908000  | 1.46700300  |
| C  | 9.16293100  | -0.34441800 | 1.59321900  |
| H  | 1.97907700  | 3.48328700  | 1.55468000  |
| H  | 0.48426100  | 3.72954100  | 2.49140500  |
| H  | 1.63190500  | 2.45173900  | 2.97601700  |
| H  | 4.69617800  | -1.25315700 | -0.37946100 |
| H  | 8.43926000  | -2.20456600 | 2.03421500  |
| H  | 9.88376200  | -1.90610600 | 2.69510200  |
| H  | 3.06769200  | 1.54036100  | 1.36412200  |
| H  | 2.64447300  | -3.79368200 | -2.47224900 |
| H  | 0.15454700  | -3.61016300 | -2.63682900 |
| H  | -1.00548300 | -1.72065100 | -1.46251300 |
| H  | 5.11835800  | 0.83052200  | 1.65046600  |
| H  | 4.58290700  | 2.10056200  | -0.48500800 |
| H  | 6.22330600  | 2.41170500  | 0.09776700  |
| H  | 5.95511900  | 1.30278700  | -1.26286400 |
| H  | 7.05333500  | -0.68852300 | -0.14422300 |

|   |             |             |             |
|---|-------------|-------------|-------------|
| H | 6.52259500  | -1.20135600 | 1.44912900  |
| H | 7.58386700  | 0.82584200  | 2.46540700  |
| H | 8.09565300  | 1.36753800  | 0.86221800  |
| H | 9.49421000  | -0.63977100 | 0.58066400  |
| H | 9.95095800  | 0.29390800  | 2.00927100  |
| H | -5.81364300 | -4.54236300 | 0.07174300  |
| H | -7.37940400 | -4.52022700 | -0.80970200 |
| H | -5.85718300 | -4.20498900 | -1.66792200 |
| H | -4.75240600 | 0.57143500  | 4.72392600  |
| H | -6.46107700 | 3.40119500  | 0.60698000  |
| H | -6.68783700 | 2.99279800  | -2.04642800 |
| H | -5.16814400 | -0.87509700 | -5.36928000 |
| H | -3.77852300 | -3.16536100 | -5.04551300 |
| H | -2.07630600 | -5.96165400 | -0.93567100 |
| H | -2.34837100 | -5.74717000 | 1.74974100  |
| H | -3.85392500 | -1.97065900 | 5.01243800  |
| H | 1.02076800  | 1.10929200  | 6.95432800  |
| H | -0.69118900 | 0.96195700  | 7.34619800  |
| H | 0.42956600  | -0.34080600 | 7.76962500  |
| H | 8.88704600  | -2.91469400 | -3.55311100 |
| H | 8.28008600  | -1.36354500 | -2.97161600 |
| H | 9.89272400  | -1.91896300 | -2.48938500 |
| H | 2.98646900  | -1.23200200 | -4.67161600 |
| H | 4.51529000  | -2.09919300 | -4.84245100 |
| H | 6.95037100  | 5.77942700  | -1.98951100 |
| H | 4.14806700  | -0.74050100 | -5.91525800 |
| H | 6.50803800  | 4.91994600  | -3.47337800 |
| H | -1.59523200 | 7.84533600  | -0.09829100 |
| O | -2.84293200 | -0.54647900 | -0.32793000 |
| H | -0.82278200 | 0.34739700  | -0.05921000 |
| H | -0.59509200 | 0.11705200  | -4.01940400 |
| H | -3.52298500 | 4.93402500  | -1.81295700 |

## TS1

|   |             |             |            |
|---|-------------|-------------|------------|
| C | 0.17719600  | 0.46030600  | 7.04050600 |
| C | -0.04638100 | -0.19608300 | 5.69292000 |
| C | -0.59072500 | 0.55802500  | 4.63200200 |
| C | 0.27304100  | -1.57500100 | 5.52397300 |
| C | -0.80387300 | -0.08331100 | 3.42503900 |
| C | 0.13710300  | -2.18088700 | 4.23435200 |
| C | -0.41554400 | -1.40770700 | 3.22646900 |
| H | -0.87331000 | 1.59533800  | 4.78489500 |
| H | 0.67169100  | -2.13435200 | 6.36475600 |

|   |             |             |             |
|---|-------------|-------------|-------------|
| H | -1.26591600 | 0.44341300  | 2.59872500  |
| H | 0.41450300  | -3.21679400 | 4.07129500  |
| H | -0.57789700 | -1.83928700 | 2.24346600  |
| C | 6.51646400  | 4.99640500  | -2.27863300 |
| C | 5.03194600  | 4.86998100  | -1.79607500 |
| H | 7.11010600  | 4.14158200  | -1.93942300 |
| H | 4.56828000  | 3.96063600  | -2.18824000 |
| H | 4.97792600  | 4.83348200  | -0.70355500 |
| H | 4.43545900  | 5.72153300  | -2.13697500 |
| N | -0.88503000 | 7.69620700  | 0.58919300  |
| C | 0.28440900  | 7.07291100  | -0.14904900 |
| C | -0.15642000 | 5.78747000  | -0.80373200 |
| O | 0.13541300  | 5.50021900  | -1.95500500 |
| C | 1.54249000  | 6.88091400  | 0.64364000  |
| O | 1.75315900  | 8.01712400  | 1.47914100  |
| H | -0.57405300 | 8.61494800  | 0.89839100  |
| H | 0.55320700  | 7.70638900  | -1.00509200 |
| H | 1.50040900  | 5.96054200  | 1.24715400  |
| H | 2.39248100  | 6.79659900  | -0.03605400 |
| H | 1.15071400  | 7.92319800  | 2.22809000  |
| N | -1.10458500 | 5.04339100  | -0.17743800 |
| C | -1.77222300 | 3.88820900  | -0.77562300 |
| C | -2.65181400 | 4.20217500  | -1.96098600 |
| O | -2.43484800 | 3.64495500  | -3.06894100 |
| C | -2.48731900 | 3.12324700  | 0.30084500  |
| H | -1.47424700 | 5.41166900  | 0.69129200  |
| H | -0.98613300 | 3.25570800  | -1.19877800 |
| H | -2.77156600 | 2.12855800  | -0.05272600 |
| H | -1.84586000 | 2.98308400  | 1.16647000  |
| H | -3.40150300 | 3.63904000  | 0.62139000  |
| C | -1.47613600 | 0.55028400  | -3.91976900 |
| H | -2.12193800 | 0.18468900  | -4.72092600 |
| H | -1.43882000 | 1.63927100  | -3.93587200 |
| H | -1.88306600 | 0.22711900  | -2.95789100 |
| C | -6.27697200 | -3.82465200 | -0.89864500 |
| S | -6.29308100 | -2.23045000 | -0.01481100 |
| C | 9.01035800  | -2.09348600 | -2.53888500 |
| C | 8.40473800  | -2.80261300 | -1.32755800 |
| C | 7.01372500  | -2.97177600 | -1.17954200 |
| C | 9.25181700  | -3.46085500 | -0.46791300 |
| C | 6.53691500  | -3.69993500 | -0.11951000 |
| C | 8.78250900  | -4.15235600 | 0.66944500  |
| C | 7.41595900  | -4.30681900 | 0.81565900  |
| H | 6.32982500  | -2.51594600 | -1.89110300 |

|    |             |             |             |
|----|-------------|-------------|-------------|
| H  | 10.32502200 | -3.37168800 | -0.61807000 |
| H  | 5.46464100  | -3.82729200 | 0.00440000  |
| H  | 9.48078500  | -4.61050100 | 1.36220300  |
| H  | 7.00254100  | -4.86148900 | 1.65220200  |
| C  | 4.20715800  | -1.02602500 | -4.80059700 |
| C  | 4.83539200  | -0.05081600 | -3.78605400 |
| H  | 4.66277600  | 0.99117700  | -4.07313900 |
| H  | 4.40255800  | -0.19942000 | -2.79267200 |
| H  | 5.91882500  | -0.19962300 | -3.70898600 |
| N  | -3.36626400 | -3.10506800 | 0.05330900  |
| N  | -4.27882400 | -1.58478900 | -2.20138700 |
| N  | -4.24235100 | -1.05864800 | 1.82232500  |
| C  | -3.45356800 | -3.28339300 | 2.52158000  |
| C  | -3.06987300 | -3.75692200 | -2.30713300 |
| C  | -5.54879900 | 0.43147600  | -2.94025300 |
| C  | -5.23662400 | 1.18116900  | 1.96773700  |
| C  | -3.16702900 | -3.76665400 | 1.24845000  |
| C  | -3.71779200 | -2.65034800 | -2.87481900 |
| C  | -5.63774800 | 0.98619900  | -1.63756500 |
| C  | -4.66619500 | 0.04891400  | 2.52125000  |
| C  | -2.57915800 | -5.05970100 | 0.99634800  |
| C  | -3.95937100 | -2.50581600 | -4.29127100 |
| C  | -6.24755500 | 2.26112600  | -1.34479200 |
| C  | -4.54394200 | -0.18313900 | 3.94263800  |
| C  | -2.42408900 | -5.17445800 | -0.35179700 |
| C  | -4.68067800 | -1.36353300 | -4.46301600 |
| C  | -6.14764600 | 2.47337900  | 0.00045300  |
| C  | -4.08928200 | -1.45389900 | 4.09594700  |
| C  | -2.94182300 | -3.96351500 | -0.93952100 |
| C  | -4.87747700 | -0.77642200 | -3.15956100 |
| C  | -5.47834400 | 1.33146800  | 0.57770300  |
| C  | -3.90907200 | -1.99748700 | 2.76980400  |
| N  | -5.16988700 | 0.44454700  | -0.44126800 |
| Fe | -4.15657000 | -1.26928400 | -0.20433000 |
| H  | -3.23763900 | -3.92218700 | 3.36933800  |
| H  | -2.70076300 | -4.52334100 | -2.97837400 |
| H  | -5.96435200 | 0.97816800  | -3.77571200 |
| H  | -5.55681800 | 1.98323700  | 2.62130600  |
| N  | 2.73927900  | -2.27876200 | -1.49793400 |
| C  | 0.79117600  | 2.74821200  | 1.81965200  |
| O  | 0.05574200  | 1.77864600  | 1.08555400  |
| N  | 4.13495300  | -0.54758500 | 0.04647400  |
| C  | 0.71186900  | 0.71622800  | 0.55816800  |
| N  | 8.58730900  | -1.31645600 | 2.66440100  |

|   |             |             |             |
|---|-------------|-------------|-------------|
| C | 2.10311500  | 0.59149600  | 0.68863200  |
| C | 2.79326000  | -0.41322900 | 0.00482100  |
| C | 2.04161300  | -1.34633000 | -0.81409600 |
| C | 0.61929700  | -1.22798000 | -0.85481000 |
| C | 2.05766100  | -3.11291000 | -2.27559500 |
| C | 0.65505500  | -3.07955800 | -2.40292000 |
| C | -0.06498500 | -2.14333400 | -1.68944900 |
| C | -0.07346000 | -0.27262600 | -0.06066100 |
| C | 5.06269700  | 0.41900900  | 0.63524500  |
| C | 5.14961000  | 1.68441900  | -0.22897000 |
| C | 6.41815000  | -0.26284200 | 0.83378600  |
| C | 7.45398800  | 0.58980000  | 1.56758400  |
| C | 8.77395500  | -0.15584500 | 1.78792900  |
| H | 1.58366900  | 3.19587500  | 1.20910100  |
| H | 0.07415000  | 3.52322200  | 2.08845000  |
| H | 1.21665400  | 2.30918900  | 2.72879800  |
| H | 4.49959400  | -1.29583000 | -0.53286000 |
| H | 8.19348200  | -2.08804800 | 2.13194900  |
| H | 9.49344100  | -1.64766000 | 2.98518900  |
| H | 2.65888700  | 1.28059600  | 1.30633200  |
| H | 2.64302000  | -3.84373700 | -2.82878700 |
| H | 0.15237700  | -3.78747900 | -3.05312300 |
| H | -1.14266500 | -2.07501800 | -1.75679200 |
| H | 4.66962200  | 0.68647600  | 1.62513300  |
| H | 4.15572900  | 2.08496000  | -0.43982300 |
| H | 5.72891300  | 2.46320900  | 0.27301100  |
| H | 5.63151000  | 1.45853000  | -1.18527700 |
| H | 6.81539200  | -0.55024000 | -0.14716500 |
| H | 6.25278600  | -1.19176600 | 1.38850100  |
| H | 7.05869300  | 0.89234700  | 2.54507000  |
| H | 7.66208100  | 1.50369900  | 0.99866200  |
| H | 9.20798700  | -0.41149200 | 0.80443100  |
| H | 9.47968700  | 0.52545500  | 2.27607500  |
| H | -5.58071400 | -4.53317400 | -0.44572500 |
| H | -7.28995900 | -4.23080500 | -0.82623900 |
| H | -6.02770300 | -3.69486700 | -1.95364700 |
| H | -4.79742200 | 0.54068000  | 4.70512700  |
| H | -6.50603900 | 3.32242400  | 0.56758900  |
| H | -6.69720100 | 2.90559400  | -2.08832600 |
| H | -5.04725500 | -0.93443600 | -5.38562600 |
| H | -3.62275400 | -3.20602300 | -5.04391700 |
| H | -2.02069600 | -6.00462900 | -0.91568900 |
| H | -2.32161100 | -5.77342600 | 1.76713000  |
| H | -3.87075000 | -1.98925100 | 5.00938800  |

|   |             |             |             |
|---|-------------|-------------|-------------|
| H | 1.03382200  | 1.14519100  | 7.01217400  |
| H | -0.69375900 | 1.04873100  | 7.34861600  |
| H | 0.37606300  | -0.27992800 | 7.82013000  |
| H | 9.03237100  | -2.76232900 | -3.40652000 |
| H | 8.42531900  | -1.21253000 | -2.82227500 |
| H | 10.03434100 | -1.77210900 | -2.33468600 |
| H | 3.12514700  | -0.87739800 | -4.86551400 |
| H | 4.37947300  | -2.06531700 | -4.50273500 |
| H | 6.97988500  | 5.90688600  | -1.88726000 |
| H | 4.62736600  | -0.88785700 | -5.80166700 |
| H | 6.56880000  | 5.03195200  | -3.37065100 |
| H | -1.61555900 | 7.85763800  | -0.09932500 |
| O | -2.63772300 | -0.42918000 | -0.34819200 |
| H | -1.53988000 | -0.40167200 | -0.05091800 |
| H | -0.47202900 | 0.13569300  | -4.04627600 |
| H | -3.48267300 | 4.92245300  | -1.82911200 |

## IM1

|   |             |             |             |
|---|-------------|-------------|-------------|
| C | 0.17530300  | 0.37909300  | 7.00280500  |
| C | -0.06366800 | -0.26744400 | 5.65310300  |
| C | -0.60716900 | 0.49804600  | 4.59995400  |
| C | 0.24062800  | -1.64855800 | 5.47444300  |
| C | -0.83459000 | -0.13430400 | 3.39089500  |
| C | 0.09019000  | -2.24582200 | 4.18240300  |
| C | -0.46111100 | -1.46144600 | 3.18246900  |
| H | -0.86606200 | 1.54095300  | 4.75460200  |
| H | 0.64377400  | -2.21565700 | 6.30767300  |
| H | -1.26222000 | 0.42192700  | 2.56390600  |
| H | 0.36521400  | -3.28042300 | 4.00869000  |
| H | -0.60698500 | -1.88417900 | 2.19240700  |
| C | 6.50000600  | 4.90272500  | -2.33227500 |
| C | 5.01742500  | 4.78866300  | -1.84075000 |
| H | 7.08689600  | 4.04205100  | -1.99672200 |
| H | 4.54448200  | 3.88290700  | -2.22957500 |
| H | 4.97051600  | 4.75080900  | -0.74817500 |
| H | 4.42611000  | 5.64562000  | -2.17773900 |
| N | -0.85491800 | 7.66138100  | 0.59867100  |
| C | 0.30331000  | 7.03039700  | -0.15062300 |
| C | -0.15479300 | 5.75317100  | -0.80950800 |
| O | 0.12664200  | 5.46942500  | -1.96423500 |
| C | 1.56447900  | 6.82121600  | 0.63276800  |
| O | 1.79210000  | 7.95053600  | 1.47315000  |
| H | -0.53367300 | 8.57736100  | 0.90568000  |

|   |             |             |             |
|---|-------------|-------------|-------------|
| H | 0.57251400  | 7.66584300  | -1.00507800 |
| H | 1.51707500  | 5.89882700  | 1.23125900  |
| H | 2.40902600  | 6.73161100  | -0.05295200 |
| H | 1.19302800  | 7.85813800  | 2.22491700  |
| N | -1.10640300 | 5.01524800  | -0.18116800 |
| C | -1.78964000 | 3.87029200  | -0.78134300 |
| C | -2.67362200 | 4.19977300  | -1.95921800 |
| O | -2.46952700 | 3.64658200  | -3.07161800 |
| C | -2.50552200 | 3.10659600  | 0.29546400  |
| H | -1.45009200 | 5.36610400  | 0.70478100  |
| H | -1.01563200 | 3.22672100  | -1.21103500 |
| H | -2.90143000 | 2.16745900  | -0.09984600 |
| H | -1.80193400 | 2.85349000  | 1.08892700  |
| H | -3.34268200 | 3.67739600  | 0.71660900  |
| C | -1.54788300 | 0.54716400  | -3.94578400 |
| H | -2.15358900 | 0.25569800  | -4.80690400 |
| H | -1.47143900 | 1.63298300  | -3.89385500 |
| H | -2.02193900 | 0.18420700  | -3.03064800 |
| C | -6.40098300 | -3.84552000 | -0.84500800 |
| S | -6.42874500 | -2.21256300 | -0.03401200 |
| C | 8.91986800  | -2.21054100 | -2.64799700 |
| C | 8.31490600  | -2.92025300 | -1.43666600 |
| C | 6.92323600  | -3.07608300 | -1.28048800 |
| C | 9.16079000  | -3.59184600 | -0.58623700 |
| C | 6.44591700  | -3.80534200 | -0.22145200 |
| C | 8.69183900  | -4.28487400 | 0.55033900  |
| C | 7.32473800  | -4.42630200 | 0.70460700  |
| H | 6.23731700  | -2.60169600 | -1.97749700 |
| H | 10.23402100 | -3.51139900 | -0.74210900 |
| H | 5.37280400  | -3.91100600 | -0.08679100 |
| H | 9.39017900  | -4.75373300 | 1.23604500  |
| H | 6.91121000  | -4.97911900 | 1.54242100  |
| C | 4.11327200  | -1.08172400 | -4.87241800 |
| C | 4.75793400  | -0.11863200 | -3.85658600 |
| H | 4.37892000  | 0.90088900  | -3.97893400 |
| H | 4.53359500  | -0.43377200 | -2.83300600 |
| H | 5.84716900  | -0.08538300 | -3.97387100 |
| N | -3.51867400 | -3.14010300 | 0.01898600  |
| N | -4.39949600 | -1.58733100 | -2.21557700 |
| N | -4.31776600 | -1.07756500 | 1.79908300  |
| C | -3.52253800 | -3.30223700 | 2.48703600  |
| C | -3.17491500 | -3.75261000 | -2.34662000 |
| C | -5.61513400 | 0.46418600  | -2.94039300 |
| C | -5.26361400 | 1.18320500  | 1.96953000  |

|    |             |             |             |
|----|-------------|-------------|-------------|
| C  | -3.27583500 | -3.79390200 | 1.21019900  |
| C  | -3.82137000 | -2.63947500 | -2.90044000 |
| C  | -5.70832400 | 1.00464100  | -1.63412700 |
| C  | -4.70831400 | 0.03990700  | 2.50945700  |
| C  | -2.65360300 | -5.06754500 | 0.94805800  |
| C  | -4.03090000 | -2.46130000 | -4.31616000 |
| C  | -6.25860500 | 2.30314000  | -1.33539800 |
| C  | -4.54609400 | -0.19031600 | 3.92433000  |
| C  | -2.50590800 | -5.17154900 | -0.40178400 |
| C  | -4.74274300 | -1.31149200 | -4.47966100 |
| C  | -6.14707400 | 2.50561900  | 0.01078200  |
| C  | -4.10130400 | -1.46613400 | 4.06933600  |
| C  | -3.06073000 | -3.97463400 | -0.98161200 |
| C  | -4.96640000 | -0.75219100 | -3.17052500 |
| C  | -5.53007100 | 1.33471100  | 0.58437900  |
| C  | -3.96830500 | -2.01733800 | 2.74371000  |
| N  | -5.27416100 | 0.43283400  | -0.43818000 |
| Fe | -4.35486200 | -1.32683400 | -0.22198300 |
| H  | -3.27462400 | -3.93386000 | 3.33126800  |
| H  | -2.78035100 | -4.49862600 | -3.02561000 |
| H  | -5.99869900 | 1.03611600  | -3.77423000 |
| H  | -5.54319800 | 1.99697800  | 2.62670600  |
| N  | 2.79145900  | -2.13082900 | -1.33619200 |
| C  | 1.10746900  | 2.95184100  | 2.13476900  |
| O  | 0.33679900  | 2.06462400  | 1.34359900  |
| N  | 4.31700200  | -0.51605500 | 0.21806700  |
| C  | 0.96827200  | 1.01382700  | 0.73682700  |
| N  | 8.89120600  | -1.45645800 | 2.53327000  |
| C  | 2.36661700  | 0.79984300  | 0.82677700  |
| C  | 2.97605300  | -0.25490200 | 0.14897600  |
| C  | 2.16619000  | -1.13797800 | -0.65489600 |
| C  | 0.74344900  | -0.93168400 | -0.71697600 |
| C  | 2.06044000  | -2.93665300 | -2.08731400 |
| C  | 0.65516500  | -2.82421600 | -2.20655600 |
| C  | -0.00552000 | -1.82889700 | -1.52561600 |
| C  | 0.21171300  | 0.12160800  | 0.02477800  |
| C  | 5.32106000  | 0.43318600  | 0.68473900  |
| C  | 5.43734300  | 1.64199800  | -0.25475700 |
| C  | 6.64486200  | -0.31971900 | 0.84860900  |
| C  | 7.77244600  | 0.48948300  | 1.48986900  |
| C  | 9.06712400  | -0.31746600 | 1.62597700  |
| H  | 1.90190100  | 3.43018600  | 1.54915300  |
| H  | 0.41202000  | 3.71749600  | 2.48209700  |
| H  | 1.54574500  | 2.43949800  | 2.99943100  |

|   |             |             |             |
|---|-------------|-------------|-------------|
| H | 4.61828100  | -1.25483700 | -0.40467100 |
| H | 8.37340100  | -2.19146200 | 2.05749000  |
| H | 9.79957200  | -1.86321100 | 2.74266400  |
| H | 2.97214900  | 1.45777300  | 1.43411500  |
| H | 2.59559100  | -3.71403100 | -2.62869400 |
| H | 0.10858300  | -3.52078100 | -2.83377300 |
| H | -1.08004500 | -1.69735700 | -1.58435400 |
| H | 5.00952900  | 0.78428700  | 1.67885900  |
| H | 4.45801000  | 2.09092500  | -0.43340300 |
| H | 6.09137700  | 2.41337500  | 0.16168700  |
| H | 5.84466200  | 1.32998900  | -1.22238400 |
| H | 6.97060800  | -0.67151100 | -0.13812500 |
| H | 6.44768300  | -1.21463700 | 1.44767300  |
| H | 7.46539000  | 0.82872800  | 2.48690200  |
| H | 7.98401600  | 1.38272400  | 0.88997900  |
| H | 9.41136400  | -0.60804100 | 0.61653200  |
| H | 9.84246100  | 0.33157400  | 2.04899300  |
| H | -5.73015700 | -4.53452000 | -0.32948300 |
| H | -7.42040800 | -4.23647900 | -0.80296100 |
| H | -6.09598600 | -3.75432300 | -1.88912400 |
| H | -4.76269100 | 0.54087200  | 4.69085200  |
| H | -6.45664300 | 3.37204400  | 0.57995000  |
| H | -6.67115000 | 2.97379200  | -2.07699500 |
| H | -5.07918700 | -0.85654500 | -5.40112200 |
| H | -3.67372700 | -3.14251800 | -5.07639000 |
| H | -2.07222800 | -5.98192200 | -0.97158300 |
| H | -2.35927600 | -5.77158500 | 1.71430200  |
| H | -3.85570300 | -1.99830700 | 4.97751000  |
| H | 1.01020000  | 1.08915200  | 6.96014800  |
| H | -0.70415400 | 0.93813000  | 7.34061800  |
| H | 0.41577600  | -0.36411700 | 7.76754700  |
| H | 8.94301100  | -2.87933800 | -3.51576700 |
| H | 8.33305600  | -1.33069000 | -2.93071100 |
| H | 9.94348400  | -1.88767600 | -2.44351800 |
| H | 3.02890200  | -1.12464300 | -4.73237400 |
| H | 4.50185500  | -2.09853700 | -4.75197900 |
| H | 6.97406400  | 5.80894900  | -1.94332500 |
| H | 4.30910100  | -0.76792600 | -5.90268300 |
| H | 6.54621500  | 4.93807800  | -3.42468300 |
| H | -1.58991300 | 7.82895800  | -0.08353500 |
| O | -2.74436700 | -0.51783100 | -0.39028400 |
| H | -2.18626000 | -0.58475800 | 0.40052500  |
| H | -0.55331300 | 0.10241400  | -4.03405300 |
| H | -3.49565000 | 4.92930000  | -1.81970100 |

## TS4

|   |             |             |             |
|---|-------------|-------------|-------------|
| C | 0.17726600  | 0.50753700  | 7.05844600  |
| C | -0.04517600 | -0.15868700 | 5.71550800  |
| C | -0.58215000 | 0.58946700  | 4.64666700  |
| C | 0.26781700  | -1.54052800 | 5.55886100  |
| C | -0.79446100 | -0.06056800 | 3.44424800  |
| C | 0.13308900  | -2.15623200 | 4.27376200  |
| C | -0.41229600 | -1.38851000 | 3.25779300  |
| H | -0.85642400 | 1.63039900  | 4.78967500  |
| H | 0.66235500  | -2.09454700 | 6.40506300  |
| H | -1.24311400 | 0.46412700  | 2.61126100  |
| H | 0.41114100  | -3.19306100 | 4.11842000  |
| H | -0.56602900 | -1.82328000 | 2.27420900  |
| C | 6.57056800  | 4.93531700  | -2.27589800 |
| C | 5.08387600  | 4.82021200  | -1.79724700 |
| H | 7.15590200  | 4.07622900  | -1.93340100 |
| H | 4.61529200  | 3.91344500  | -2.18819500 |
| H | 5.02659200  | 4.78543400  | -0.70510700 |
| H | 4.49513200  | 5.67609200  | -2.14161400 |
| N | -0.82658800 | 7.69585300  | 0.54489200  |
| C | 0.34210900  | 7.06064500  | -0.18430600 |
| C | -0.10305700 | 5.77215300  | -0.82996300 |
| O | 0.19111200  | 5.47405900  | -1.97789700 |
| C | 1.59655500  | 6.86874500  | 0.61416500  |
| O | 1.81021600  | 8.01065100  | 1.44110000  |
| H | -0.49883300 | 8.60114300  | 0.87603700  |
| H | 0.61687400  | 7.68571100  | -1.04459600 |
| H | 1.54789200  | 5.95363200  | 1.22449100  |
| H | 2.44777400  | 6.77338100  | -0.06256400 |
| H | 1.23676600  | 7.90715300  | 2.21087900  |
| N | -1.05705200 | 5.03798800  | -0.20087800 |
| C | -1.72893900 | 3.88101900  | -0.79171800 |
| C | -2.60182400 | 4.19102400  | -1.98300500 |
| O | -2.38543400 | 3.62195300  | -3.08517600 |
| C | -2.45116100 | 3.12885500  | 0.28835000  |
| H | -1.42494600 | 5.41586800  | 0.66447700  |
| H | -0.94832500 | 3.23547000  | -1.20656200 |
| H | -2.89757600 | 2.22698700  | -0.13523900 |
| H | -1.77149900 | 2.83568900  | 1.07957000  |
| H | -3.27532300 | 3.71952200  | 0.70899700  |
| C | -1.43891500 | 0.51678300  | -3.90771700 |
| H | -2.10306600 | 0.12538300  | -4.68163200 |

|   |             |             |             |
|---|-------------|-------------|-------------|
| H | -1.38385500 | 1.60295300  | -3.97636600 |
| H | -1.83132900 | 0.24577400  | -2.92464500 |
| C | -6.28848200 | -3.83936100 | -0.86425800 |
| S | -6.34189800 | -2.14622000 | -0.20296000 |
| C | 9.02919600  | -2.16902600 | -2.46996200 |
| C | 8.41594600  | -2.86522900 | -1.25494200 |
| C | 7.02358500  | -3.02600700 | -1.11025300 |
| C | 9.25678900  | -3.52076100 | -0.38718200 |
| C | 6.53955000  | -3.74325900 | -0.04601800 |
| C | 8.78016300  | -4.20031300 | 0.75426200  |
| C | 7.41236100  | -4.34676000 | 0.89715600  |
| H | 6.34425800  | -2.56995000 | -1.82556200 |
| H | 10.33101500 | -3.43700600 | -0.53365800 |
| H | 5.46615700  | -3.85696100 | 0.07926000  |
| H | 9.47388700  | -4.65449300 | 1.45428300  |
| H | 6.99323300  | -4.89004400 | 1.73835300  |
| C | 4.23911700  | -1.09576600 | -4.75650100 |
| C | 4.86882300  | -0.11535300 | -3.74783500 |
| H | 4.83098000  | 0.91587300  | -4.11308000 |
| H | 4.33673500  | -0.15331700 | -2.79375600 |
| H | 5.92014800  | -0.36184200 | -3.55711000 |
| N | -3.37954700 | -3.11215400 | 0.08715700  |
| N | -4.25454700 | -1.59396100 | -2.17653400 |
| N | -4.24149100 | -1.03402600 | 1.83746800  |
| C | -3.45743600 | -3.25446400 | 2.55792100  |
| C | -3.06005100 | -3.76931000 | -2.26544900 |
| C | -5.51550000 | 0.42627800  | -2.94102200 |
| C | -5.21588700 | 1.21440100  | 1.96173300  |
| C | -3.17477500 | -3.76059300 | 1.28822700  |
| C | -3.70249900 | -2.66717900 | -2.84883200 |
| C | -5.58848400 | 0.99984000  | -1.64127100 |
| C | -4.65537500 | 0.08178000  | 2.53219500  |
| C | -2.58319400 | -5.05792700 | 1.05027700  |
| C | -3.94289400 | -2.53444500 | -4.26613600 |
| C | -6.20169000 | 2.27569200  | -1.36150200 |
| C | -4.52353800 | -0.13062500 | 3.95443000  |
| C | -2.42204200 | -5.18308400 | -0.29552300 |
| C | -4.66024600 | -1.39102200 | -4.44622600 |
| C | -6.10972700 | 2.50083900  | -0.01785700 |
| C | -4.07050100 | -1.40176600 | 4.11819500  |
| C | -2.94165000 | -3.97527300 | -0.89319900 |
| C | -4.85259100 | -0.78917300 | -3.14926600 |
| C | -5.44436300 | 1.36372300  | 0.57007900  |
| C | -3.90361100 | -1.95937500 | 2.79666400  |

|    |             |             |             |
|----|-------------|-------------|-------------|
| N  | -5.11225900 | 0.46504800  | -0.43915700 |
| Fe | -4.18114000 | -1.30136300 | -0.17001300 |
| H  | -3.24150200 | -3.88347300 | 3.41342300  |
| H  | -2.68142800 | -4.53756000 | -2.92962600 |
| H  | -5.93291600 | 0.96602900  | -3.78015800 |
| H  | -5.53552400 | 2.02244000  | 2.60886000  |
| N  | 2.61605300  | -2.28460500 | -1.53792300 |
| C  | 0.79167900  | 2.69605200  | 1.96111900  |
| O  | 0.02406500  | 1.80014100  | 1.17302600  |
| N  | 4.07604300  | -0.60159700 | 0.03836200  |
| C  | 0.65726500  | 0.76614100  | 0.54243900  |
| N  | 8.60346600  | -1.25913900 | 2.57896400  |
| C  | 2.06210900  | 0.60814800  | 0.62711900  |
| C  | 2.72287000  | -0.41433600 | -0.04293200 |
| C  | 1.95084800  | -1.32232500 | -0.85164000 |
| C  | 0.52083000  | -1.16544700 | -0.92121900 |
| C  | 1.91922100  | -3.11237200 | -2.29716000 |
| C  | 0.51302600  | -3.04264800 | -2.43171600 |
| C  | -0.18245400 | -2.07296300 | -1.75008100 |
| C  | -0.06840300 | -0.12142500 | -0.21165400 |
| C  | 5.00170500  | 0.39092400  | 0.57597900  |
| C  | 5.08084000  | 1.64300800  | -0.30968100 |
| C  | 6.36683300  | -0.27152100 | 0.77500400  |
| C  | 7.40740200  | 0.60450700  | 1.47419300  |
| C  | 8.74456400  | -0.11529500 | 1.67228800  |
| H  | 1.55430300  | 3.20607900  | 1.36121100  |
| H  | 0.08467000  | 3.43783200  | 2.33592900  |
| H  | 1.25964600  | 2.18188500  | 2.80745900  |
| H  | 4.43296700  | -1.30444300 | -0.59561300 |
| H  | 8.15205300  | -2.02761900 | 2.08926400  |
| H  | 9.52617100  | -1.60875000 | 2.82545300  |
| H  | 2.63393800  | 1.30375400  | 1.22236300  |
| H  | 2.48439000  | -3.86985800 | -2.83645500 |
| H  | -0.00380100 | -3.74587100 | -3.07664600 |
| H  | -1.25322500 | -1.95885900 | -1.82177400 |
| H  | 4.62776700  | 0.68141800  | 1.56778800  |
| H  | 4.08369600  | 2.02091300  | -0.54567400 |
| H  | 5.63701100  | 2.44464700  | 0.18365700  |
| H  | 5.58305600  | 1.40880600  | -1.25369900 |
| H  | 6.75490200  | -0.57613700 | -0.20469900 |
| H  | 6.21335500  | -1.19097300 | 1.34829400  |
| H  | 7.03047300  | 0.91591300  | 2.45629600  |
| H  | 7.58831300  | 1.51376900  | 0.88868300  |
| H  | 9.15283000  | -0.38552500 | 0.68121700  |

|   |             |             |             |
|---|-------------|-------------|-------------|
| H | 9.45524800  | 0.58569200  | 2.12506500  |
| H | -5.66039600 | -4.48551600 | -0.24836100 |
| H | -7.31222400 | -4.22086800 | -0.88130700 |
| H | -5.90074500 | -3.84172700 | -1.88628500 |
| H | -4.76511500 | 0.60310800  | 4.71107700  |
| H | -6.47393500 | 3.35394100  | 0.53910400  |
| H | -6.65024000 | 2.91320100  | -2.11168000 |
| H | -5.02251900 | -0.96856900 | -5.37358400 |
| H | -3.60711100 | -3.23947300 | -5.01443500 |
| H | -2.00839900 | -6.01448400 | -0.84971300 |
| H | -2.32145600 | -5.76380700 | 1.82684400  |
| H | -3.84251400 | -1.92461600 | 5.03651000  |
| H | 0.35666900  | -0.22805800 | 7.84713200  |
| H | 1.04605800  | 1.17685300  | 7.03082100  |
| H | -0.68596000 | 1.11411400  | 7.35283700  |
| H | 9.01577400  | -2.83125700 | -3.34290900 |
| H | 8.47134000  | -1.26599600 | -2.73874100 |
| H | 10.06623700 | -1.88445300 | -2.27741400 |
| H | 3.19044700  | -0.84406400 | -4.94121600 |
| H | 4.26684300  | -2.12008400 | -4.37209100 |
| H | 7.04010900  | 5.84288300  | -1.88470400 |
| H | 4.76519700  | -1.07806500 | -5.71640400 |
| H | 6.62638400  | 4.96846200  | -3.36791800 |
| H | -1.53996100 | 7.88726500  | -0.15387900 |
| O | -2.47639100 | -0.47137000 | -0.29232800 |
| H | -0.44445400 | 0.07982100  | -4.02819800 |
| H | -3.42494200 | 4.92231400  | -1.86256000 |
| H | -2.51615800 | 0.36586700  | 0.18853700  |

## P

|   |             |             |             |
|---|-------------|-------------|-------------|
| C | 0.12391000  | 0.42214600  | 7.02091400  |
| C | -0.10788900 | -0.22575700 | 5.67061500  |
| C | -0.65254300 | 0.53675400  | 4.61590100  |
| C | 0.20425300  | -1.60524200 | 5.49291800  |
| C | -0.87321800 | -0.09687200 | 3.40626900  |
| C | 0.06057200  | -2.20339300 | 4.20052000  |
| C | -0.49213300 | -1.42203900 | 3.19899600  |
| H | -0.92216600 | 1.57665800  | 4.77384200  |
| H | 0.60538200  | -2.17064700 | 6.32827400  |
| H | -1.31762700 | 0.44371000  | 2.57887200  |
| H | 0.33798700  | -3.23753400 | 4.02824700  |
| H | -0.65228700 | -1.84779200 | 2.21265200  |
| C | 6.45028900  | 4.97869000  | -2.29704500 |

|   |             |             |             |
|---|-------------|-------------|-------------|
| C | 4.96703000  | 4.85662600  | -1.80951700 |
| H | 7.02940800  | 4.09937100  | -1.99882600 |
| H | 4.48655100  | 3.97206000  | -2.23618300 |
| H | 4.92042300  | 4.77242900  | -0.71946600 |
| H | 4.38316500  | 5.73237200  | -2.10950100 |
| N | -0.92728000 | 7.69837600  | 0.61330500  |
| C | 0.23635600  | 7.07351000  | -0.13272600 |
| C | -0.21311100 | 5.79381800  | -0.79274500 |
| O | 0.07299400  | 5.51150000  | -1.94668900 |
| C | 1.49644700  | 6.87109000  | 0.65417600  |
| O | 1.71572900  | 8.00166800  | 1.49508800  |
| H | -0.58468800 | 8.58201800  | 0.98557600  |
| H | 0.50517000  | 7.71017200  | -0.98625000 |
| H | 1.45285900  | 5.94819500  | 1.25228200  |
| H | 2.34230300  | 6.78431900  | -0.03056100 |
| H | 1.17921100  | 7.87108100  | 2.28677700  |
| N | -1.16250600 | 5.05087300  | -0.16702600 |
| C | -1.83835100 | 3.90185100  | -0.76882400 |
| C | -2.71960000 | 4.22783400  | -1.94957100 |
| O | -2.51105600 | 3.67410300  | -3.06093100 |
| C | -2.55274800 | 3.13484500  | 0.30594800  |
| H | -1.53453600 | 5.42972600  | 0.69658100  |
| H | -1.05826100 | 3.26551100  | -1.19864400 |
| H | -3.02974700 | 2.24353400  | -0.11194300 |
| H | -1.85092900 | 2.83107300  | 1.08226600  |
| H | -3.35440000 | 3.72297600  | 0.76820200  |
| C | -1.56963300 | 0.58042600  | -3.93243700 |
| H | -2.33520800 | 0.20192200  | -4.61227900 |
| H | -1.63832600 | 1.66523500  | -3.85850900 |
| H | -1.72313900 | 0.14394000  | -2.94201000 |
| C | -6.53389500 | -3.76001400 | -1.08828300 |
| S | -6.52283900 | -2.27679600 | -0.02526800 |
| C | 8.90882500  | -2.12162500 | -2.60537300 |
| C | 8.30429700  | -2.83455600 | -1.39574100 |
| C | 6.91298400  | -2.99766100 | -1.24325700 |
| C | 9.15137400  | -3.50160300 | -0.54290100 |
| C | 6.43668900  | -3.72952700 | -0.18563300 |
| C | 8.68295700  | -4.19679600 | 0.59249900  |
| C | 7.31621800  | -4.34557300 | 0.74304000  |
| H | 6.22492000  | -2.53050600 | -1.94301900 |
| H | 10.22462100 | -3.41557300 | -0.69589100 |
| H | 5.36331300  | -3.83983500 | -0.05684200 |
| H | 9.38199800  | -4.66213600 | 1.27996500  |
| H | 6.90341400  | -4.90011700 | 1.58003300  |

|    |             |             |             |
|----|-------------|-------------|-------------|
| C  | 4.10250700  | -1.01861100 | -4.84322400 |
| C  | 4.73916600  | -0.05191200 | -3.82577200 |
| H  | 4.32151400  | 0.95567600  | -3.91781200 |
| H  | 4.55606400  | -0.39234300 | -2.80220400 |
| H  | 5.82297200  | 0.02275100  | -3.97087600 |
| N  | -3.53377200 | -3.10228200 | 0.02353300  |
| N  | -4.40760900 | -1.56640000 | -2.19074200 |
| N  | -4.38757400 | -1.07398300 | 1.79096400  |
| C  | -3.54178600 | -3.27914200 | 2.49524300  |
| C  | -3.17836400 | -3.72801000 | -2.33737400 |
| C  | -5.63932500 | 0.47570500  | -2.93829500 |
| C  | -5.30524000 | 1.19694800  | 1.97252100  |
| C  | -3.27933800 | -3.76073000 | 1.21637300  |
| C  | -3.83302300 | -2.62003300 | -2.88941000 |
| C  | -5.70689200 | 1.02401700  | -1.63245200 |
| C  | -4.76921800 | 0.04454500  | 2.51378000  |
| C  | -2.62891400 | -5.02158100 | 0.95863800  |
| C  | -4.05389000 | -2.45337900 | -4.30363300 |
| C  | -6.26562900 | 2.31760400  | -1.33625000 |
| C  | -4.59474800 | -0.17722400 | 3.92813300  |
| C  | -2.48077700 | -5.12899800 | -0.39000400 |
| C  | -4.77815400 | -1.31163700 | -4.46650500 |
| C  | -6.15973300 | 2.52295200  | 0.01026700  |
| C  | -4.14070300 | -1.44924100 | 4.07180200  |
| C  | -3.06206400 | -3.94507600 | -0.97104200 |
| C  | -4.99339600 | -0.74609400 | -3.15866300 |
| C  | -5.53853800 | 1.35728400  | 0.58398800  |
| C  | -4.01817400 | -2.00283600 | 2.74565500  |
| N  | -5.24182200 | 0.45127900  | -0.43689900 |
| Fe | -4.54798300 | -1.39825000 | -0.19906000 |
| H  | -3.28200300 | -3.90511200 | 3.34033600  |
| H  | -2.78027400 | -4.47319800 | -3.01573600 |
| H  | -6.04080200 | 1.03669100  | -3.77124400 |
| H  | -5.59633200 | 2.00687400  | 2.63022200  |
| N  | 2.96393800  | -2.39872200 | -1.24065200 |
| C  | 0.91033100  | 2.78138100  | 1.85977700  |
| O  | 0.24342000  | 1.85232300  | 1.02085400  |
| N  | 4.40025600  | -0.55466100 | 0.13746700  |
| C  | 0.96367800  | 0.79711200  | 0.50690400  |
| N  | 8.92291700  | -1.30332900 | 2.57166600  |
| C  | 2.36578600  | 0.69749300  | 0.60426300  |
| C  | 3.04593000  | -0.37805000 | 0.04126800  |
| C  | 2.28209100  | -1.37453900 | -0.66132500 |
| C  | 0.85657500  | -1.26299800 | -0.73585400 |

|   |             |             |             |
|---|-------------|-------------|-------------|
| C | 2.27810000  | -3.32448700 | -1.88800600 |
| C | 0.86816900  | -3.31068900 | -2.00424600 |
| C | 0.15820800  | -2.28191200 | -1.43101900 |
| C | 0.20385600  | -0.16467500 | -0.13556900 |
| C | 5.34119600  | 0.44972800  | 0.61064300  |
| C | 5.45707500  | 1.63020200  | -0.36541600 |
| C | 6.68481400  | -0.24398800 | 0.85758600  |
| C | 7.75215900  | 0.61577500  | 1.53362800  |
| C | 9.07739200  | -0.13498400 | 1.69843300  |
| H | 1.70082000  | 3.31285900  | 1.31700000  |
| H | 0.15292000  | 3.50177100  | 2.17143500  |
| H | 1.33137000  | 2.28428700  | 2.74063600  |
| H | 4.75612200  | -1.33873400 | -0.39133900 |
| H | 8.45234500  | -2.04822100 | 2.06288700  |
| H | 9.84100600  | -1.67480400 | 2.80289900  |
| H | 2.91766400  | 1.46225100  | 1.13036800  |
| H | 2.85602100  | -4.12538600 | -2.34501500 |
| H | 0.36108100  | -4.10338000 | -2.54444600 |
| H | -0.92116600 | -2.22919900 | -1.50379900 |
| H | 4.97112500  | 0.82444900  | 1.57668500  |
| H | 4.47085800  | 2.02624100  | -0.61709500 |
| H | 6.05014300  | 2.44554200  | 0.05891900  |
| H | 5.93368300  | 1.30459100  | -1.29587700 |
| H | 7.07026800  | -0.60286600 | -0.10454600 |
| H | 6.49364500  | -1.13337400 | 1.46655200  |
| H | 7.40198200  | 0.93402100  | 2.52326700  |
| H | 7.94000400  | 1.52150300  | 0.94442300  |
| H | 9.46785600  | -0.38423400 | 0.69444900  |
| H | 9.80836300  | 0.53698400  | 2.16262700  |
| H | -5.78438700 | -4.48505500 | -0.76648200 |
| H | -7.52604200 | -4.20899100 | -0.99266300 |
| H | -6.36099000 | -3.50090700 | -2.13411900 |
| H | -4.80238800 | 0.55719700  | 4.69419700  |
| H | -6.48333300 | 3.38551600  | 0.57788300  |
| H | -6.68758000 | 2.98262100  | -2.07802700 |
| H | -5.12568300 | -0.86508500 | -5.38827800 |
| H | -3.69453600 | -3.13370500 | -5.06370900 |
| H | -2.02998800 | -5.93205800 | -0.95696400 |
| H | -2.31907000 | -5.71715800 | 1.72674300  |
| H | -3.87899200 | -1.97531900 | 4.97924400  |
| H | 0.31395100  | -0.32403900 | 7.79692300  |
| H | 0.98939400  | 1.09567300  | 6.99465200  |
| H | -0.73939100 | 1.02014100  | 7.33198500  |
| H | 8.92692000  | -2.78612400 | -3.47656800 |

|   |             |             |             |
|---|-------------|-------------|-------------|
| H | 8.32447800  | -1.23823100 | -2.88239100 |
| H | 9.93420000  | -1.80357500 | -2.40217100 |
| H | 3.02341100  | -1.09907900 | -4.68022900 |
| H | 4.52551800  | -2.02416400 | -4.74836500 |
| H | 6.93229800  | 5.86348300  | -1.87037800 |
| H | 4.26446400  | -0.68191100 | -5.87213000 |
| H | 6.49603000  | 5.05991300  | -3.38698500 |
| H | -1.63026200 | 7.93398300  | -0.08253000 |
| O | -1.17009200 | -0.08634100 | -0.20100500 |
| H | -0.58154200 | 0.29145100  | -4.29987500 |
| H | -3.53961700 | 4.95924000  | -1.81474600 |
| H | -1.43359500 | 0.75639600  | 0.19306600  |

## TS2

|   |             |             |             |
|---|-------------|-------------|-------------|
| C | 0.89387100  | -1.00835400 | 6.71775800  |
| C | 0.69960900  | -1.29774500 | 5.24284000  |
| C | -0.04289800 | -0.39906200 | 4.44809500  |
| C | 1.24900400  | -2.48872600 | 4.68455600  |
| C | -0.21981000 | -0.71097900 | 3.11201500  |
| C | 1.13570600  | -2.72970800 | 3.27818600  |
| C | 0.38523600  | -1.82939500 | 2.53990700  |
| H | -0.49323200 | 0.48354200  | 4.89266500  |
| H | 1.82491100  | -3.16799600 | 5.30494300  |
| H | -0.83114700 | -0.08367300 | 2.46921900  |
| H | 1.56788700  | -3.61586500 | 2.82943000  |
| H | 0.19964600  | -2.01776300 | 1.48977400  |
| C | 5.65988100  | 7.04993100  | -1.02594000 |
| C | 4.25932800  | 6.51278900  | -0.57598900 |
| H | 6.46704800  | 6.48359900  | -0.55145300 |
| H | 4.13840800  | 5.45988500  | -0.84847900 |
| H | 4.14034700  | 6.59688900  | 0.50924300  |
| H | 3.45013600  | 7.07560200  | -1.05036600 |
| N | -1.89089600 | 7.38327400  | 2.60294500  |
| C | -0.68214400 | 7.22389600  | 1.70040400  |
| C | -0.92898900 | 6.10921900  | 0.71452900  |
| O | -0.67022100 | 6.21218300  | -0.47522700 |
| C | 0.64146700  | 7.06546100  | 2.38666400  |
| O | 0.70168000  | 7.94553600  | 3.50706800  |
| H | -1.70781400 | 8.19872700  | 3.18439400  |
| H | -0.59063300 | 8.10814400  | 1.05537800  |
| H | 0.80815700  | 6.02491600  | 2.70532000  |
| H | 1.44313100  | 7.33578600  | 1.69670500  |
| H | 0.22331900  | 7.51359700  | 4.22589400  |

|   |             |             |             |
|---|-------------|-------------|-------------|
| N | -1.68285000 | 5.05397700  | 1.11819900  |
| C | -2.17178000 | 4.00330700  | 0.22700100  |
| C | -3.17256900 | 4.45543600  | -0.80678700 |
| O | -2.93634800 | 4.28139400  | -2.03091500 |
| C | -2.66241300 | 2.84855300  | 1.05276800  |
| H | -2.05852000 | 5.09820500  | 2.05885600  |
| H | -1.31683500 | 3.67323000  | -0.36718800 |
| H | -2.78015200 | 1.95008700  | 0.44437700  |
| H | -1.94664900 | 2.61088600  | 1.84009800  |
| H | -3.62831900 | 3.06939000  | 1.52403700  |
| C | -1.49790600 | 1.78218300  | -3.73938500 |
| H | -1.86131400 | 2.07647600  | -4.72731900 |
| H | -0.43801800 | 1.53270600  | -3.81187300 |
| H | -1.64484700 | 2.61672900  | -3.05219800 |
| C | -6.75786100 | -2.42553500 | 0.38825800  |
| S | -5.56221400 | -3.04574600 | -0.83157100 |
| C | 9.36208900  | 0.92131500  | -3.32581700 |
| C | 8.97860200  | -0.19776000 | -2.35724000 |
| C | 7.65244600  | -0.66128600 | -2.24073200 |
| C | 9.98690400  | -0.89189100 | -1.73242800 |
| C | 7.38988700  | -1.73324500 | -1.42476500 |
| C | 9.72866500  | -1.94673400 | -0.83091800 |
| C | 8.42537400  | -2.39475600 | -0.71414100 |
| H | 6.85102200  | -0.15768300 | -2.77400200 |
| H | 11.01394300 | -0.56011900 | -1.86657400 |
| H | 6.37057800  | -2.09925900 | -1.32965100 |
| H | 10.54359800 | -2.43254200 | -0.30430200 |
| H | 8.17690300  | -3.22808900 | -0.06354900 |
| C | 4.30121800  | 1.63139400  | -5.11880000 |
| C | 4.81327800  | 2.38630000  | -3.87796100 |
| H | 4.06716800  | 3.09791000  | -3.51045600 |
| H | 5.04051700  | 1.69511200  | -3.05890900 |
| H | 5.72614900  | 2.94807300  | -4.10239300 |
| N | -2.41271700 | -3.13211700 | -0.94432700 |
| N | -3.66996100 | -1.17579400 | -2.65593700 |
| N | -3.51947500 | -1.84347100 | 1.36186600  |
| C | -2.30785600 | -3.98365600 | 1.37786600  |
| C | -2.17839600 | -3.02425000 | -3.39196600 |
| C | -5.40636400 | 0.62051800  | -2.77211300 |
| C | -4.89711100 | 0.03263700  | 2.14140600  |
| C | -2.01931900 | -4.03935600 | 0.01522200  |
| C | -3.04435800 | -1.94608900 | -3.61509900 |
| C | -5.47039900 | 0.78765700  | -1.36417800 |
| C | -4.10564100 | -1.08462100 | 2.35050900  |

|    |             |             |             |
|----|-------------|-------------|-------------|
| O  | -1.84798900 | -0.48496600 | -0.39063400 |
| C  | -1.23292400 | -5.08166500 | -0.60455700 |
| C  | -3.46713800 | -1.52279100 | -4.92778900 |
| C  | -6.33252600 | 1.73994100  | -0.71145000 |
| C  | -3.88169300 | -1.69472100 | 3.64176500  |
| C  | -1.15891800 | -4.79298300 | -1.93346000 |
| C  | -4.38754500 | -0.53218800 | -4.75516700 |
| C  | -6.17521200 | 1.59204500  | 0.63820100  |
| C  | -3.18972800 | -2.84385100 | 3.41928300  |
| C  | -1.92146900 | -3.58484900 | -2.14482400 |
| C  | -4.52811300 | -0.31348900 | -3.33704000 |
| C  | -5.21974900 | 0.53448500  | 0.85525000  |
| C  | -2.97242000 | -2.93368300 | 1.99408900  |
| N  | -4.77584100 | 0.07446900  | -0.38011000 |
| Fe | -3.35611500 | -1.37103700 | -0.64053000 |
| H  | -1.93060300 | -4.78251500 | 2.00541700  |
| H  | -1.75166700 | -3.50911200 | -4.26089000 |
| H  | -6.02051400 | 1.24260800  | -3.40869000 |
| H  | -5.34221800 | 0.52766000  | 2.99597200  |
| N  | 2.25669700  | -2.53763100 | -1.98384800 |
| C  | 0.77405500  | 2.51159600  | 1.45480700  |
| O  | 0.00683400  | 1.83480100  | 0.46479900  |
| N  | 3.19337500  | -1.78312900 | 0.40964400  |
| C  | 0.47478700  | 0.66090000  | -0.02243500 |
| N  | 4.16799000  | -4.66891200 | 4.57583800  |
| C  | 1.61521500  | 0.06000300  | 0.48770400  |
| C  | 2.14448900  | -1.09652700 | -0.09764900 |
| C  | 1.57602800  | -1.55972100 | -1.34137700 |
| C  | 0.43504500  | -0.90166000 | -1.87999100 |
| C  | 1.89337700  | -2.83865200 | -3.22291700 |
| C  | 0.85806200  | -2.17262400 | -3.89438300 |
| C  | 0.11806900  | -1.22141000 | -3.21054500 |
| C  | -0.28899500 | 0.11559800  | -1.11802700 |
| C  | 3.92370900  | -1.43542600 | 1.62117900  |
| C  | 4.97423700  | -0.34848700 | 1.35515300  |
| C  | 4.51654100  | -2.71169800 | 2.23108000  |
| C  | 4.99958300  | -2.51874900 | 3.67206000  |
| C  | 5.35745400  | -3.82888800 | 4.37707100  |
| H  | 3.52203100  | -2.53205400 | -0.19011200 |
| H  | 3.87539200  | -5.07174600 | 3.68935400  |
| H  | 4.40096500  | -5.45740200 | 5.17401000  |
| H  | 2.09935800  | 0.47391300  | 1.35766800  |
| H  | 2.46042200  | -3.62402100 | -3.71885200 |
| H  | 0.63042400  | -2.41697900 | -4.92639900 |

|   |             |             |             |
|---|-------------|-------------|-------------|
| H | -0.70229900 | -0.71708900 | -3.69734900 |
| H | 3.18327200  | -1.05790100 | 2.33463000  |
| H | 4.51446100  | 0.52374400  | 0.88215200  |
| H | 5.44327900  | -0.02086200 | 2.28759300  |
| H | 5.75866200  | -0.71909700 | 0.68807400  |
| H | 5.33993400  | -3.07767200 | 1.60043700  |
| H | 3.73015600  | -3.47231200 | 2.20803700  |
| H | 4.20793900  | -2.02807700 | 4.24979400  |
| H | 5.87670200  | -1.86134700 | 3.68675000  |
| H | 6.16830600  | -4.33278200 | 3.82050100  |
| H | 5.76004000  | -3.59308900 | 5.36821600  |
| H | -7.09025600 | -1.41316000 | 0.15090100  |
| H | -7.62406400 | -3.09588000 | 0.35136600  |
| H | -6.34546500 | -2.45044300 | 1.39885400  |
| H | -4.23269700 | -1.28951900 | 4.58111400  |
| H | -6.68151500 | 2.13057600  | 1.42862000  |
| H | -6.98613600 | 2.42669400  | -1.23278200 |
| H | -4.93574600 | 0.01135900  | -5.51271200 |
| H | -3.11911600 | -1.95914500 | -5.85448400 |
| H | -0.65633200 | -5.34550000 | -2.71539400 |
| H | -0.80145600 | -5.91978900 | -0.07416400 |
| H | -2.83924400 | -3.57120600 | 4.13836600  |
| H | -0.06096100 | -0.80387200 | 7.21499800  |
| H | 1.36757500  | -1.84916300 | 7.23090100  |
| H | 1.52912800  | -0.12723000 | 6.87003900  |
| H | 10.28770100 | 1.41152000  | -3.01392400 |
| H | 9.51706100  | 0.52229200  | -4.33481100 |
| H | 8.57707300  | 1.68101200  | -3.39211100 |
| H | 3.39310200  | 1.06502200  | -4.88858700 |
| H | 5.04982900  | 0.92316600  | -5.48897500 |
| H | 5.78052500  | 8.10295900  | -0.75450100 |
| H | 4.06534800  | 2.32302300  | -5.93354100 |
| H | 5.77896600  | 6.96460900  | -2.11013700 |
| H | -2.67524100 | 7.62818300  | 2.00405000  |
| H | -0.81066600 | 0.85777000  | -1.70063600 |
| H | 1.79036100  | 2.71029100  | 1.09532300  |
| H | 0.25892800  | 3.45456100  | 1.63375900  |
| H | 0.82045500  | 1.93181800  | 2.38360900  |
| H | -4.10783100 | 4.94048400  | -0.46625700 |
| H | -2.07606500 | 0.92411000  | -3.39705600 |

IM2

|   |            |             |            |
|---|------------|-------------|------------|
| C | 0.87733500 | -1.01802700 | 6.71156600 |
|---|------------|-------------|------------|

|   |             |             |             |
|---|-------------|-------------|-------------|
| C | 0.68725900  | -1.30586200 | 5.23579300  |
| C | -0.05461500 | -0.40732500 | 4.44029700  |
| C | 1.23992500  | -2.49529900 | 4.67742300  |
| C | -0.22765800 | -0.71783900 | 3.10337900  |
| C | 1.13055300  | -2.73467100 | 3.27043200  |
| C | 0.38054600  | -1.83460200 | 2.53143700  |
| H | -0.51613000 | 0.46798000  | 4.88814400  |
| H | 1.80541700  | -3.18063300 | 5.30042200  |
| H | -0.86016700 | -0.11469700 | 2.45767000  |
| H | 1.55443200  | -3.62875100 | 2.82891900  |
| H | 0.16585200  | -2.02199900 | 1.48514200  |
| C | 5.65052700  | 7.05730300  | -1.00992500 |
| C | 4.24966800  | 6.51744100  | -0.56420100 |
| H | 6.45761000  | 6.48587700  | -0.54137700 |
| H | 4.12739200  | 5.46729900  | -0.84710800 |
| H | 4.13135600  | 6.59147600  | 0.52187200  |
| H | 3.44085500  | 7.08556000  | -1.03273800 |
| N | -1.90993000 | 7.37446700  | 2.60020600  |
| C | -0.69864900 | 7.21808300  | 1.70053600  |
| C | -0.94127500 | 6.10426600  | 0.71264300  |
| O | -0.67965300 | 6.20912200  | -0.47632200 |
| C | 0.62346000  | 7.06082300  | 2.38995400  |
| O | 0.67947500  | 7.93958200  | 3.51160800  |
| H | -1.73562000 | 8.19553300  | 3.17632800  |
| H | -0.60654800 | 8.10319100  | 1.05685400  |
| H | 0.79088900  | 6.01990600  | 2.70831200  |
| H | 1.42682700  | 7.33365300  | 1.70302300  |
| H | 0.18179500  | 7.51499600  | 4.22185100  |
| N | -1.69451800 | 5.04735400  | 1.11308100  |
| C | -2.17957100 | 3.99705400  | 0.21930900  |
| C | -3.17843100 | 4.44895300  | -0.81639800 |
| O | -2.93889500 | 4.27681100  | -2.04017200 |
| C | -2.67049200 | 2.84048900  | 1.04237200  |
| H | -2.08212800 | 5.09630000  | 2.04894000  |
| H | -1.32250800 | 3.67550400  | -0.37660100 |
| H | -2.75745200 | 1.93097800  | 0.44506800  |
| H | -1.98056400 | 2.62576200  | 1.85901300  |
| H | -3.65449400 | 3.04615000  | 1.48075000  |
| C | -1.49216400 | 1.78197700  | -3.74814300 |
| H | -1.82366400 | 2.03420200  | -4.75885300 |
| H | -0.43549300 | 1.50979400  | -3.77853600 |
| H | -1.64022100 | 2.64797000  | -3.10181300 |
| C | -6.50616100 | -2.55328400 | 0.44504800  |
| S | -5.33041000 | -2.86025400 | -0.91436600 |

|    |             |             |             |
|----|-------------|-------------|-------------|
| C  | 9.36800200  | 0.93728500  | -3.30807200 |
| C  | 8.98378800  | -0.18359400 | -2.34187300 |
| C  | 7.65807100  | -0.64930600 | -2.22930700 |
| C  | 9.99157200  | -0.87695700 | -1.71537400 |
| C  | 7.39507000  | -1.72268800 | -1.41535600 |
| C  | 9.73267600  | -1.93332300 | -0.81583800 |
| C  | 8.42978400  | -2.38350300 | -0.70293200 |
| H  | 6.85809300  | -0.14721000 | -2.76624400 |
| H  | 11.01844900 | -0.54404200 | -1.84713000 |
| H  | 6.37699900  | -2.09475600 | -1.32811600 |
| H  | 10.54692900 | -2.41910900 | -0.28831600 |
| H  | 8.18184100  | -3.21955900 | -0.05558600 |
| C  | 4.31060300  | 1.64182400  | -5.11299700 |
| C  | 4.81835100  | 2.39595600  | -3.86991900 |
| H  | 4.06613600  | 3.09832300  | -3.49708000 |
| H  | 5.05621200  | 1.70339800  | -3.05470300 |
| H  | 5.72454800  | 2.96826700  | -4.09425500 |
| N  | -2.41266000 | -3.13438200 | -0.96222300 |
| N  | -3.66964500 | -1.19281100 | -2.66598500 |
| N  | -3.53144500 | -1.85472600 | 1.32967900  |
| C  | -2.30626000 | -3.99155200 | 1.35987100  |
| C  | -2.16618200 | -3.02595500 | -3.40841500 |
| C  | -5.40132000 | 0.61307300  | -2.79219700 |
| C  | -4.90366700 | 0.01976700  | 2.12185500  |
| C  | -2.00899400 | -4.03804900 | -0.00307300 |
| C  | -3.03606500 | -1.95059800 | -3.63107300 |
| C  | -5.46273300 | 0.77782500  | -1.38189600 |
| C  | -4.10822100 | -1.09479400 | 2.32476000  |
| O  | -1.47993600 | -0.55587200 | -0.21357400 |
| C  | -1.19417600 | -5.06491400 | -0.61770400 |
| C  | -3.44100100 | -1.51368900 | -4.94611000 |
| C  | -6.30763500 | 1.74962300  | -0.73224900 |
| C  | -3.86875000 | -1.69283700 | 3.61969400  |
| C  | -1.11810200 | -4.77503000 | -1.94545600 |
| C  | -4.36320400 | -0.52568200 | -4.77313400 |
| C  | -6.15727800 | 1.60168300  | 0.61756800  |
| C  | -3.17778700 | -2.84144000 | 3.39673100  |
| C  | -1.90774500 | -3.58206700 | -2.15893200 |
| C  | -4.52189400 | -0.32479100 | -3.35285000 |
| C  | -5.22049300 | 0.52623800  | 0.83617100  |
| C  | -2.97742900 | -2.93959300 | 1.96796800  |
| N  | -4.77593900 | 0.05516300  | -0.39532900 |
| Fe | -3.57269300 | -1.53241100 | -0.66570100 |
| H  | -1.92417500 | -4.78598000 | 1.99036800  |

|   |             |             |             |
|---|-------------|-------------|-------------|
| H | -1.73713200 | -3.51054300 | -4.27736800 |
| H | -6.00761300 | 1.24233800  | -3.42929400 |
| H | -5.34608000 | 0.51418700  | 2.97850200  |
| N | 2.30478500  | -2.38160900 | -1.98128300 |
| C | 0.71404700  | 2.54059400  | 1.57609600  |
| O | -0.00236600 | 1.85843200  | 0.53626700  |
| N | 3.18335900  | -1.67521500 | 0.40157700  |
| C | 0.45381400  | 0.70585400  | 0.07461900  |
| N | 4.10055100  | -4.77998600 | 4.40207200  |
| C | 1.61579100  | 0.14210500  | 0.55894900  |
| C | 2.13392200  | -1.00848300 | -0.05153200 |
| C | 1.55608300  | -1.48098300 | -1.32237800 |
| C | 0.38123500  | -0.89154000 | -1.81043300 |
| C | 1.93765500  | -2.69776500 | -3.22309900 |
| C | 0.84579500  | -2.09729100 | -3.84938700 |
| C | 0.05704800  | -1.20233200 | -3.13145500 |
| C | -0.47629100 | 0.04943600  | -0.94425100 |
| C | 3.92691800  | -1.39540800 | 1.63292500  |
| C | 5.00063000  | -0.32942900 | 1.38893000  |
| C | 4.48526500  | -2.71497900 | 2.17801100  |
| C | 4.97346900  | -2.59783100 | 3.62516500  |
| C | 5.30371300  | -3.94870000 | 4.26483400  |
| H | 3.48286700  | -2.42557200 | -0.22030200 |
| H | 3.84697900  | -5.18302500 | 3.50396500  |
| H | 4.29362800  | -5.56816000 | 5.01408300  |
| H | 2.11783700  | 0.54941400  | 1.42209600  |
| H | 2.55275400  | -3.42850000 | -3.74200300 |
| H | 0.60840100  | -2.33860500 | -4.87993900 |
| H | -0.80088900 | -0.74174900 | -3.59427600 |
| H | 3.19339500  | -1.02994600 | 2.35776900  |
| H | 4.55940600  | 0.57923800  | 0.97013900  |
| H | 5.49588800  | -0.06508500 | 2.32690700  |
| H | 5.76071500  | -0.69122800 | 0.68991400  |
| H | 5.29729100  | -3.07156800 | 1.52801200  |
| H | 3.67894400  | -3.45265400 | 2.12873500  |
| H | 4.19007800  | -2.12133000 | 4.22525200  |
| H | 5.86376800  | -1.95972900 | 3.66993800  |
| H | 6.11691200  | -4.43392000 | 3.69578200  |
| H | 5.69429700  | -3.76744400 | 5.27176600  |
| H | -6.86226100 | -1.52109700 | 0.44137200  |
| H | -7.35678800 | -3.22063300 | 0.28147600  |
| H | -6.06526300 | -2.77554000 | 1.41879400  |
| H | -4.20778600 | -1.27904800 | 4.55991200  |
| H | -6.65452800 | 2.15152800  | 1.40627700  |

|   |             |             |             |
|---|-------------|-------------|-------------|
| H | -6.94568200 | 2.44896900  | -1.25668900 |
| H | -4.89918500 | 0.02962900  | -5.53123300 |
| H | -3.07920000 | -1.93767900 | -5.87358800 |
| H | -0.60059400 | -5.31764000 | -2.72521300 |
| H | -0.74857100 | -5.89425300 | -0.08429000 |
| H | -2.81420100 | -3.56214800 | 4.11646500  |
| H | -0.07390700 | -0.77426500 | 7.19722200  |
| H | 1.31219500  | -1.87447500 | 7.23333000  |
| H | 1.54534900  | -0.16192300 | 6.86788200  |
| H | 10.28563100 | 1.43622400  | -2.98675500 |
| H | 9.53809900  | 0.53743800  | -4.31421100 |
| H | 8.57710200  | 1.68977200  | -3.38474700 |
| H | 3.40799500  | 1.06606700  | -4.88416200 |
| H | 5.06516000  | 0.94286300  | -5.48857300 |
| H | 5.77213500  | 8.10748900  | -0.72844600 |
| H | 4.06607800  | 2.33519800  | -5.92344700 |
| H | 5.76864600  | 6.98242900  | -2.09495500 |
| H | -2.69578400 | 7.60831300  | 1.99880600  |
| H | -0.83423400 | 0.85643100  | -1.60073100 |
| H | 1.73494100  | 2.76232700  | 1.25089700  |
| H | 0.16813900  | 3.46700500  | 1.74233300  |
| H | 0.72939700  | 1.93551900  | 2.48706800  |
| H | -4.11638100 | 4.92839600  | -0.47665200 |
| H | -2.09473600 | 0.95213700  | -3.37923300 |

### TS3

|   |             |             |             |
|---|-------------|-------------|-------------|
| C | 0.80654800  | -0.60220800 | 6.90586500  |
| C | 0.63848700  | -0.97607400 | 5.44680300  |
| C | -0.07371400 | -0.11601600 | 4.58446400  |
| C | 1.18123000  | -2.20567900 | 4.97194600  |
| C | -0.22764800 | -0.50435700 | 3.26567400  |
| C | 1.09341900  | -2.52825300 | 3.58012100  |
| C | 0.37207500  | -1.66311400 | 2.77394400  |
| H | -0.51944900 | 0.79731800  | 4.96689200  |
| H | 1.73278700  | -2.85390800 | 5.64461100  |
| H | -0.82413700 | 0.08444200  | 2.57353000  |
| H | 1.52674200  | -3.44515200 | 3.20019700  |
| H | 0.20151500  | -1.90654700 | 1.73186200  |
| C | 5.85332700  | 6.91442800  | -1.19644200 |
| C | 4.43580700  | 6.42405200  | -0.74587700 |
| H | 6.64201500  | 6.36077800  | -0.67795400 |
| H | 4.30215400  | 5.36039200  | -0.96594800 |
| H | 4.29859300  | 6.56633200  | 0.33106100  |

|   |             |             |             |
|---|-------------|-------------|-------------|
| H | 3.64512100  | 6.97429400  | -1.26415600 |
| N | -1.76495700 | 7.56774600  | 2.24267700  |
| C | -0.54036900 | 7.33822800  | 1.37746600  |
| C | -0.78360300 | 6.17037900  | 0.45413800  |
| O | -0.49873000 | 6.19879500  | -0.73377800 |
| C | 0.76631400  | 7.20250300  | 2.10007300  |
| O | 0.81660200  | 8.14665200  | 3.16765600  |
| H | -1.57868800 | 8.40994100  | 2.78355000  |
| H | -0.42236700 | 8.18098500  | 0.68303300  |
| H | 0.90973500  | 6.18015500  | 2.48225800  |
| H | 1.58588500  | 7.42060700  | 1.41258900  |
| H | 0.32437700  | 7.76152400  | 3.90348000  |
| N | -1.56154300 | 5.15159300  | 0.90318300  |
| C | -2.04781500 | 4.05668000  | 0.06535600  |
| C | -3.02002000 | 4.46041500  | -1.01465000 |
| O | -2.76124000 | 4.21060600  | -2.22099400 |
| C | -2.57283600 | 2.95999500  | 0.94722300  |
| H | -1.95316900 | 5.25537500  | 1.83252900  |
| H | -1.20445500 | 3.69249300  | -0.51947600 |
| H | -2.75285700 | 2.04672000  | 0.38092000  |
| H | -1.86415400 | 2.72435300  | 1.74265700  |
| H | -3.51781800 | 3.25271700  | 1.42222200  |
| C | -1.32569400 | 1.59445900  | -3.74722700 |
| H | -1.31852300 | 2.45628100  | -4.42075800 |
| H | -0.30368400 | 1.26528300  | -3.56549900 |
| H | -1.78393100 | 1.89468400  | -2.80831900 |
| C | -6.56508500 | -2.38883000 | 0.44681100  |
| S | -5.34587600 | -2.76217000 | -0.86151300 |
| C | 9.50903300  | 0.60891100  | -3.04929900 |
| C | 9.08887200  | -0.44578900 | -2.02484200 |
| C | 7.75223000  | -0.87983800 | -1.90963600 |
| C | 10.07325500 | -1.11510300 | -1.33861100 |
| C | 7.45793700  | -1.90044000 | -1.03763400 |
| C | 9.78040400  | -2.11055500 | -0.38180000 |
| C | 8.46840400  | -2.53293900 | -0.26714100 |
| H | 6.97047900  | -0.39846300 | -2.49040900 |
| H | 11.10775600 | -0.80696200 | -1.47107200 |
| H | 6.43473700  | -2.25668100 | -0.95112200 |
| H | 10.57670300 | -2.57559100 | 0.19004500  |
| H | 8.19408000  | -3.32372000 | 0.42480600  |
| C | 4.49685200  | 1.28237100  | -4.99032300 |
| C | 4.99733100  | 2.09843100  | -3.78449600 |
| H | 4.27455300  | 2.86951300  | -3.49951800 |
| H | 5.15742200  | 1.45743800  | -2.91027000 |

|    |             |             |             |
|----|-------------|-------------|-------------|
| H  | 5.94564300  | 2.59853400  | -4.00783100 |
| N  | -2.43170700 | -3.18791600 | -0.69535300 |
| N  | -3.28318000 | -1.04816300 | -2.52569700 |
| N  | -3.57457600 | -1.73424600 | 1.50467400  |
| C  | -2.32872900 | -3.84503100 | 1.68361400  |
| C  | -2.08606600 | -3.17289500 | -3.13073000 |
| C  | -5.27054200 | 0.54682700  | -2.79734000 |
| C  | -4.87208600 | 0.24515200  | 2.15218400  |
| C  | -2.04068100 | -4.01998500 | 0.33134300  |
| C  | -2.85688000 | -2.06798400 | -3.44221700 |
| C  | -5.36521500 | 0.79018200  | -1.39068600 |
| C  | -4.12878600 | -0.89169700 | 2.43910700  |
| O  | -1.76575900 | -0.74052800 | -0.22523500 |
| C  | -1.23085300 | -5.09422000 | -0.20422200 |
| C  | -3.36369300 | -1.79354800 | -4.74243400 |
| C  | -6.23869000 | 1.78611400  | -0.81730100 |
| C  | -3.89820500 | -1.39621200 | 3.77528700  |
| C  | -1.13880000 | -4.89216500 | -1.54836100 |
| C  | -4.23999100 | -0.74565400 | -4.64327700 |
| C  | -6.09620100 | 1.73494100  | 0.53940200  |
| C  | -3.21083800 | -2.56061400 | 3.63762500  |
| C  | -1.89938200 | -3.69684700 | -1.84314200 |
| C  | -4.29286600 | -0.31547600 | -3.28625700 |
| C  | -5.15699300 | 0.67803600  | 0.83574500  |
| C  | -3.01509300 | -2.76119600 | 2.21873800  |
| N  | -4.69104400 | 0.13407300  | -0.35965300 |
| Fe | -3.50077200 | -1.50880800 | -0.49447000 |
| H  | -1.94023300 | -4.58337300 | 2.37628400  |
| H  | -1.72918800 | -3.77065300 | -3.96082500 |
| H  | -5.93588100 | 1.05821900  | -3.47908900 |
| H  | -5.30945700 | 0.80588300  | 2.96976600  |
| N  | 2.07011000  | -2.73590200 | -2.13935900 |
| C  | 0.56746300  | 2.42826500  | 0.79462400  |
| O  | -0.30413300 | 1.68429000  | -0.07134300 |
| N  | 2.85571200  | -1.85470900 | 0.26379500  |
| C  | 0.09803700  | 0.47549200  | -0.47887600 |
| N  | 4.21680400  | -4.27128900 | 4.60208700  |
| C  | 1.30623700  | -0.01381300 | 0.03606900  |
| C  | 1.80340600  | -1.26491000 | -0.31136800 |
| C  | 1.24354800  | -1.87961000 | -1.50877300 |
| C  | 0.04482100  | -1.34491500 | -2.03821000 |
| C  | 1.81651800  | -3.02266500 | -3.41413100 |
| C  | 0.81558300  | -2.35920300 | -4.12172800 |
| C  | -0.05589700 | -1.52315200 | -3.42648200 |

|   |             |             |             |
|---|-------------|-------------|-------------|
| C | -0.85326500 | -0.37640000 | -1.24826200 |
| C | 3.61556300  | -1.32293700 | 1.39503300  |
| C | 4.60559200  | -0.23668200 | 0.95418500  |
| C | 4.28773700  | -2.49229400 | 2.12423500  |
| C | 4.79609100  | -2.11891900 | 3.51935100  |
| C | 5.30168700  | -3.32051800 | 4.32123900  |
| H | 3.20045000  | -2.66300000 | -0.24658800 |
| H | 3.99579500  | -4.80400300 | 3.76478100  |
| H | 4.52834200  | -4.95367300 | 5.28825200  |
| H | 1.83514300  | 0.53900400  | 0.79212300  |
| H | 2.47948900  | -3.73629600 | -3.89776000 |
| H | 0.71953900  | -2.48812500 | -5.19474900 |
| H | -0.80029200 | -0.97109400 | -3.97471300 |
| H | 2.87933300  | -0.89011700 | 2.07988700  |
| H | 4.10266700  | 0.53957200  | 0.37161400  |
| H | 5.06501800  | 0.23834700  | 1.82544900  |
| H | 5.40477200  | -0.65819400 | 0.33895800  |
| H | 5.11318400  | -2.88360800 | 1.51144900  |
| H | 3.54326400  | -3.28935500 | 2.21339900  |
| H | 3.97913100  | -1.65213600 | 4.08073700  |
| H | 5.60780900  | -1.38646100 | 3.43838000  |
| H | 6.16201400  | -3.77305800 | 3.79568000  |
| H | 5.67988300  | -2.96056800 | 5.28408400  |
| H | -6.89195300 | -1.34704100 | 0.40060500  |
| H | -7.43196000 | -3.03565800 | 0.28922300  |
| H | -6.15702900 | -2.58674300 | 1.44058700  |
| H | -4.23089600 | -0.91044700 | 4.68253000  |
| H | -6.60643400 | 2.33028400  | 1.28526000  |
| H | -6.87542700 | 2.44376100  | -1.39435800 |
| H | -4.86686800 | -0.33853300 | -5.42552700 |
| H | -3.14625000 | -2.39162900 | -5.61732300 |
| H | -0.60886800 | -5.48192800 | -2.28379600 |
| H | -0.79654800 | -5.88996500 | 0.38608000  |
| H | -2.84648700 | -3.22627500 | 4.40786000  |
| H | -0.15221500 | -0.33415400 | 7.36331200  |
| H | 1.23649900  | -1.42516400 | 7.48262700  |
| H | 1.46971800  | 0.26392300  | 7.02048600  |
| H | 10.43572300 | 1.10330800  | -2.74754200 |
| H | 9.67780700  | 0.14890200  | -4.02967600 |
| H | 8.73737500  | 1.37454000  | -3.17620800 |
| H | 3.55300200  | 0.77745900  | -4.76108200 |
| H | 5.22297000  | 0.51510100  | -5.27862900 |
| H | 5.98676000  | 7.97804900  | -0.97755300 |
| H | 4.32826600  | 1.92485900  | -5.86006200 |

|   |             |             |             |
|---|-------------|-------------|-------------|
| H | 5.99052400  | 6.77099000  | -2.27232300 |
| H | -2.53182100 | 7.79351700  | 1.61436100  |
| H | -2.19085500 | -0.38402400 | -2.21627800 |
| H | 1.54825700  | 2.55985100  | 0.32918900  |
| H | 0.11144700  | 3.40132500  | 0.94000600  |
| H | 0.67369000  | 1.92574000  | 1.76089700  |
| H | -3.95482100 | 4.97834700  | -0.72339600 |
| H | -1.90422400 | 0.79530000  | -4.21014400 |

## TS5

|   |             |             |             |
|---|-------------|-------------|-------------|
| C | 0.91133500  | -1.17955000 | 6.55145800  |
| C | 0.67166200  | -1.45201500 | 5.07999600  |
| C | -0.06170700 | -0.52484500 | 4.30987400  |
| C | 1.16955400  | -2.65542700 | 4.50044600  |
| C | -0.28128400 | -0.82136200 | 2.97661100  |
| C | 1.01411900  | -2.88244200 | 3.09568900  |
| C | 0.27401600  | -1.95391900 | 2.38240200  |
| H | -0.47017100 | 0.37105300  | 4.76811800  |
| H | 1.74605800  | -3.35360200 | 5.09767600  |
| H | -0.87796600 | -0.16097100 | 2.35544900  |
| H | 1.42236800  | -3.77296200 | 2.63117400  |
| H | 0.08660300  | -2.11639600 | 1.32442900  |
| C | 5.73455900  | 6.78258500  | -1.25604500 |
| C | 4.32940900  | 6.28587100  | -0.77487700 |
| H | 6.53639900  | 6.20869300  | -0.78150300 |
| H | 4.18152500  | 5.23047000  | -1.02358900 |
| H | 4.22839300  | 6.39537900  | 0.31002200  |
| H | 3.52557100  | 6.85633900  | -1.24898200 |
| N | -1.71002800 | 7.32452600  | 2.56205500  |
| C | -0.52953500 | 7.13414500  | 1.62866800  |
| C | -0.83558100 | 6.03496200  | 0.64198800  |
| O | -0.60311800 | 6.13841100  | -0.55315000 |
| C | 0.80505600  | 6.92955300  | 2.28057000  |
| O | 0.92046300  | 7.79911100  | 3.40489700  |
| H | -1.52245100 | 8.16999200  | 3.09712200  |
| H | -0.42645300 | 8.01990300  | 0.98755300  |
| H | 0.94789200  | 5.88204000  | 2.58861100  |
| H | 1.59830100  | 7.18108700  | 1.57418900  |
| H | 0.37653900  | 7.41418900  | 4.10420500  |
| N | -1.61167800 | 5.00057800  | 1.05755400  |
| C | -2.15529800 | 3.97260700  | 0.17165900  |
| C | -3.16848800 | 4.46337800  | -0.83369000 |
| O | -2.96366000 | 4.28860600  | -2.06515400 |

|   |             |             |             |
|---|-------------|-------------|-------------|
| C | -2.66115000 | 2.82724700  | 1.00190900  |
| H | -1.95037600 | 5.03412200  | 2.01199200  |
| H | -1.32930400 | 3.61176400  | -0.44809600 |
| H | -2.87616400 | 1.96604100  | 0.36980800  |
| H | -1.89428600 | 2.50966700  | 1.70627800  |
| H | -3.56973300 | 3.09971000  | 1.55436400  |
| C | -1.65098800 | 1.76174700  | -3.82303000 |
| H | -2.01297800 | 1.00973600  | -4.52755200 |
| H | -0.61535700 | 2.01905300  | -4.06245100 |
| H | -2.26688000 | 2.65922700  | -3.87875200 |
| C | -6.81484200 | -2.49296800 | 0.50788100  |
| S | -5.71336200 | -2.90344700 | -0.88745300 |
| C | 9.18495300  | 0.55841200  | -3.68740000 |
| C | 8.79066200  | -0.55523800 | -2.71690800 |
| C | 7.45391700  | -0.97796700 | -2.57031000 |
| C | 9.79185500  | -1.28494600 | -2.12192700 |
| C | 7.17815500  | -2.04720000 | -1.75510700 |
| C | 9.52306000  | -2.33776700 | -1.22114700 |
| C | 8.20964700  | -2.74580000 | -1.07479100 |
| H | 6.65450900  | -0.44440400 | -3.07670500 |
| H | 10.82520500 | -0.98474200 | -2.27962400 |
| H | 6.14955400  | -2.38183400 | -1.64384900 |
| H | 10.33513800 | -2.85281900 | -0.71846100 |
| H | 7.95203100  | -3.57777500 | -0.42586100 |
| C | 4.10602500  | 1.43888600  | -5.34896800 |
| C | 4.67203500  | 2.16836900  | -4.11639300 |
| H | 4.04912400  | 3.02530600  | -3.84139300 |
| H | 4.71740300  | 1.50138600  | -3.24841000 |
| H | 5.68497300  | 2.54036500  | -4.30427100 |
| N | -2.70114200 | -3.13948300 | -1.03778000 |
| N | -3.97060100 | -1.20692500 | -2.68670000 |
| N | -3.73124000 | -1.87220500 | 1.26830500  |
| C | -2.51305800 | -4.01464900 | 1.27382700  |
| C | -2.47159600 | -3.02509100 | -3.49144200 |
| C | -5.56745200 | 0.71394300  | -2.76754700 |
| C | -4.95551800 | 0.07468100  | 2.12778400  |
| C | -2.27465400 | -4.06270500 | -0.09653400 |
| C | -3.31671900 | -1.92333000 | -3.67716900 |
| C | -5.62168500 | 0.84769200  | -1.35618800 |
| C | -4.21061500 | -1.07597400 | 2.29507800  |
| O | -1.20620300 | 0.43757500  | -0.50220700 |
| C | -1.48922900 | -5.09200100 | -0.73347800 |
| C | -3.67280200 | -1.40650200 | -4.97643500 |
| C | -6.34667200 | 1.89283500  | -0.67991500 |

|    |             |             |             |
|----|-------------|-------------|-------------|
| C  | -3.89838400 | -1.65575300 | 3.57796200  |
| C  | -1.44315900 | -4.79718600 | -2.06097400 |
| C  | -4.56199600 | -0.39535700 | -4.77689200 |
| C  | -6.16173100 | 1.73093200  | 0.66390000  |
| C  | -3.25498000 | -2.82729400 | 3.33191500  |
| C  | -2.21784200 | -3.59593700 | -2.25091100 |
| C  | -4.75081300 | -0.26057400 | -3.35341700 |
| C  | -5.32305900 | 0.57517300  | 0.85430700  |
| C  | -3.15434100 | -2.95729900 | 1.89921500  |
| N  | -4.98657800 | 0.04898600  | -0.39362300 |
| Fe | -3.96810500 | -1.61873200 | -0.71775000 |
| H  | -2.10559300 | -4.80579800 | 1.89172800  |
| H  | -2.04816800 | -3.49285900 | -4.37246600 |
| H  | -6.11485800 | 1.41004700  | -3.38837100 |
| H  | -5.30470100 | 0.61245000  | 3.00077900  |
| N  | 2.75147300  | -2.04598200 | -1.68559200 |
| C  | 1.05019900  | 2.72399500  | 2.18147400  |
| O  | 0.28556800  | 1.87577900  | 1.32867800  |
| N  | 4.01110600  | -1.07300800 | 0.45581800  |
| C  | 0.91164500  | 0.96021800  | 0.57571700  |
| N  | 3.98125400  | -4.70131400 | 4.25560900  |
| C  | 2.23652300  | 0.53219300  | 0.84978400  |
| C  | 2.80814500  | -0.52766600 | 0.16886700  |
| C  | 2.09912400  | -1.09702700 | -0.97925100 |
| C  | 0.79417200  | -0.66984900 | -1.28458600 |
| C  | 2.12622800  | -2.57859900 | -2.73048900 |
| C  | 0.82660800  | -2.21783000 | -3.11408000 |
| C  | 0.14799100  | -1.26471800 | -2.37273900 |
| C  | 0.05660500  | 0.35404400  | -0.46790500 |
| C  | 4.67057000  | -1.02816700 | 1.75939900  |
| C  | 6.04118300  | -0.35605100 | 1.64256200  |
| C  | 4.73349800  | -2.45450900 | 2.33739800  |
| C  | 5.05465900  | -2.50366900 | 3.83420700  |
| C  | 5.22319100  | -3.92673000 | 4.37223200  |
| H  | 4.25213900  | -1.83677000 | -0.16777400 |
| H  | 3.79180000  | -4.90430900 | 3.27741700  |
| H  | 4.09574100  | -5.60360500 | 4.71025900  |
| H  | 2.78689200  | 1.02207900  | 1.63929600  |
| H  | 2.67674500  | -3.33237700 | -3.28902200 |
| H  | 0.36104500  | -2.69109000 | -3.97029800 |
| H  | -0.86636000 | -0.96159500 | -2.59902700 |
| H  | 4.03020700  | -0.43797900 | 2.42190400  |
| H  | 5.93650200  | 0.65820600  | 1.24784500  |
| H  | 6.53843600  | -0.29679200 | 2.61495100  |

|   |             |             |             |
|---|-------------|-------------|-------------|
| H | 6.68653800  | -0.91651600 | 0.95850000  |
| H | 5.47628500  | -3.03621000 | 1.77069900  |
| H | 3.75498400  | -2.91527100 | 2.16849600  |
| H | 4.24465700  | -2.01223100 | 4.38595000  |
| H | 5.97919300  | -1.95143900 | 4.04018500  |
| H | 6.08624100  | -4.39723000 | 3.86677200  |
| H | 5.47730600  | -3.87200700 | 5.43662000  |
| H | -7.13248700 | -1.44956900 | 0.46953800  |
| H | -7.69426800 | -3.13579500 | 0.41464400  |
| H | -6.33254500 | -2.68797700 | 1.46721700  |
| H | -4.15016700 | -1.20936700 | 4.53024300  |
| H | -6.56017500 | 2.33657100  | 1.46720600  |
| H | -6.92133100 | 2.65883900  | -1.18349000 |
| H | -5.04494800 | 0.22764800  | -5.51743800 |
| H | -3.28794500 | -1.78610300 | -5.91338300 |
| H | -0.94661900 | -5.33841100 | -2.85492000 |
| H | -1.03511900 | -5.92423100 | -0.21257400 |
| H | -2.85005100 | -3.53782000 | 4.03913300  |
| H | -0.03256300 | -1.06171300 | 7.09630200  |
| H | 1.47066000  | -1.99184900 | 7.02259500  |
| H | 1.48128100  | -0.25415200 | 6.69711500  |
| H | 10.13827900 | 1.00996000  | -3.40188600 |
| H | 9.29120500  | 0.16416800  | -4.70451600 |
| H | 8.42767300  | 1.34790100  | -3.72087800 |
| H | 3.09598500  | 1.06441600  | -5.15510200 |
| H | 4.73114100  | 0.58310200  | -5.62476300 |
| H | 5.88191700  | 7.83811700  | -1.00866200 |
| H | 4.05340500  | 2.10587600  | -6.21506700 |
| H | 5.83551900  | 6.67215600  | -2.33978800 |
| H | -2.51700100 | 7.52838200  | 1.97809900  |
| H | 0.76112100  | 1.40777000  | -0.91181100 |
| H | 1.86656500  | 3.20558000  | 1.63275500  |
| H | 0.35079900  | 3.48387000  | 2.52908800  |
| H | 1.44621400  | 2.16294400  | 3.03463000  |
| H | -4.08296900 | 4.96810600  | -0.46437900 |
| H | -1.70302100 | 1.36766600  | -2.80454900 |

#### IM4

|   |             |             |            |
|---|-------------|-------------|------------|
| C | 1.00805800  | -1.42090300 | 6.46805600 |
| C | 0.75562400  | -1.63256100 | 4.98874600 |
| C | 0.00393300  | -0.68155100 | 4.26686400 |
| C | 1.26039300  | -2.80419900 | 4.35278600 |
| C | -0.22671900 | -0.92298800 | 2.92438700 |

|   |             |             |             |
|---|-------------|-------------|-------------|
| C | 1.09250400  | -2.97230500 | 2.94118900  |
| C | 0.33458100  | -2.02252000 | 2.27624400  |
| H | -0.39585900 | 0.19747600  | 4.76292100  |
| H | 1.84841300  | -3.52195800 | 4.91663000  |
| H | -0.80933600 | -0.22086400 | 2.33717900  |
| H | 1.50315600  | -3.83564800 | 2.42959200  |
| H | 0.14679400  | -2.14046300 | 1.21272200  |
| C | 5.65970900  | 6.92411900  | -1.03786800 |
| C | 4.26533000  | 6.39116900  | -0.56419900 |
| H | 6.47297600  | 6.35878100  | -0.57285100 |
| H | 4.13938800  | 5.33683800  | -0.82922600 |
| H | 4.16314700  | 6.48043200  | 0.52234100  |
| H | 3.44967900  | 6.95303900  | -1.02853800 |
| N | -1.74900100 | 7.21637700  | 2.87608800  |
| C | -0.57656700 | 7.07979000  | 1.92332200  |
| C | -0.88111900 | 6.02063500  | 0.89334100  |
| O | -0.66260200 | 6.17800800  | -0.29853000 |
| C | 0.76709800  | 6.86260400  | 2.55209500  |
| O | 0.88501700  | 7.68427400  | 3.71162600  |
| H | -1.53892300 | 8.01127300  | 3.47647100  |
| H | -0.48976500 | 7.99331500  | 1.31965900  |
| H | 0.92557700  | 5.80654400  | 2.81466600  |
| H | 1.54903500  | 7.15274400  | 1.84760600  |
| H | 0.40970700  | 7.23220800  | 4.42014900  |
| N | -1.64131200 | 4.96053600  | 1.27187500  |
| C | -2.18302100 | 3.96571400  | 0.34806000  |
| C | -3.21273400 | 4.48693400  | -0.62474500 |
| O | -3.01845800 | 4.36855300  | -1.86458800 |
| C | -2.66740000 | 2.77976300  | 1.13329100  |
| H | -1.96130700 | 4.94456800  | 2.23305800  |
| H | -1.36047900 | 3.63916400  | -0.29503300 |
| H | -3.01410200 | 1.99340400  | 0.46232100  |
| H | -1.84348700 | 2.36322000  | 1.71275100  |
| H | -3.49595700 | 3.04684400  | 1.80145600  |
| C | -1.69757700 | 1.93420100  | -3.74321300 |
| H | -2.22215100 | 1.89362900  | -4.69991400 |
| H | -0.63573700 | 1.72705200  | -3.90421500 |
| H | -1.82255500 | 2.91601600  | -3.28698400 |
| C | -6.78276100 | -2.57006400 | 0.46223600  |
| S | -5.70104800 | -2.91022000 | -0.96723700 |
| C | 9.15185600  | 0.85004400  | -3.77053200 |
| C | 8.78022700  | -0.30875600 | -2.84499800 |
| C | 7.44986400  | -0.75263200 | -2.70309100 |
| C | 9.79568100  | -1.05187300 | -2.29228800 |

|    |             |             |             |
|----|-------------|-------------|-------------|
| C  | 7.19454200  | -1.85895100 | -1.93187100 |
| C  | 9.54811900  | -2.14546400 | -1.43504300 |
| C  | 8.24091000  | -2.57438800 | -1.29301100 |
| H  | 6.63907700  | -0.20415300 | -3.17446600 |
| H  | 10.82387500 | -0.73216100 | -2.44609100 |
| H  | 6.16834500  | -2.19428500 | -1.80131200 |
| H  | 10.37142600 | -2.67123600 | -0.96237800 |
| H  | 7.99827400  | -3.43263500 | -0.67324400 |
| C  | 4.04605800  | 1.74311700  | -5.34049800 |
| C  | 4.61721400  | 2.42533900  | -4.08347400 |
| H  | 3.99126300  | 3.26635300  | -3.76857100 |
| H  | 4.67604300  | 1.72402200  | -3.24404900 |
| H  | 5.62569800  | 2.81202800  | -4.26462400 |
| N  | -2.67335500 | -3.09754100 | -1.16164300 |
| N  | -3.97764100 | -1.11105100 | -2.71100100 |
| N  | -3.69012300 | -1.94274600 | 1.20499300  |
| C  | -2.44144200 | -4.06534000 | 1.10843900  |
| C  | -2.46193100 | -2.87138800 | -3.60990300 |
| C  | -5.59064700 | 0.79748600  | -2.69380000 |
| C  | -4.91929900 | -0.04466500 | 2.16289100  |
| C  | -2.22118100 | -4.05359200 | -0.26536000 |
| C  | -3.31904500 | -1.77090600 | -3.73910100 |
| C  | -5.63442200 | 0.86765300  | -1.27796300 |
| C  | -4.16278800 | -1.19441100 | 2.27184000  |
| O  | -1.05510700 | 0.49154800  | -0.50370500 |
| C  | -1.42520900 | -5.04089600 | -0.95309400 |
| C  | -3.68183900 | -1.19161900 | -5.00891600 |
| C  | -6.35876900 | 1.87696600  | -0.54991700 |
| C  | -3.82342900 | -1.82112100 | 3.52495000  |
| C  | -1.39688200 | -4.68858800 | -2.26678200 |
| C  | -4.58243700 | -0.20228100 | -4.75783500 |
| C  | -6.15729900 | 1.65959000  | 0.78388800  |
| C  | -3.16925300 | -2.97302100 | 3.22238200  |
| C  | -2.19238100 | -3.49351500 | -2.39811400 |
| C  | -4.77099000 | -0.14173300 | -3.32992400 |
| C  | -5.30898100 | 0.50364200  | 0.91612500  |
| C  | -3.08956500 | -3.04454900 | 1.78464200  |
| N  | -4.98145500 | 0.03263800  | -0.35749000 |
| Fe | -3.96820200 | -1.62018300 | -0.76518200 |
| H  | -2.01254300 | -4.87365400 | 1.68827300  |
| H  | -2.03644400 | -3.29156200 | -4.51346400 |
| H  | -6.14854300 | 1.51650500  | -3.27814500 |
| H  | -5.26060500 | 0.45348200  | 3.06203500  |
| N  | 2.68979400  | -2.13466000 | -1.75546500 |

|   |             |             |             |
|---|-------------|-------------|-------------|
| C | 1.10315800  | 3.07586600  | 1.71686100  |
| O | 0.43139100  | 1.91407100  | 1.26944200  |
| N | 3.78057100  | -1.48543000 | 0.61079100  |
| C | 1.12979600  | 1.22245900  | 0.25359200  |
| N | 4.02584200  | -5.01711000 | 4.45481100  |
| C | 2.29411200  | 0.42696900  | 0.78631100  |
| C | 2.75044400  | -0.69500800 | 0.18004600  |
| C | 2.08210100  | -1.16683400 | -1.05198200 |
| C | 0.82109100  | -0.64834900 | -1.41091200 |
| C | 2.08280700  | -2.57619300 | -2.86414900 |
| C | 0.84407700  | -2.11345000 | -3.30470500 |
| C | 0.18609500  | -1.15085600 | -2.54401200 |
| C | 0.15555100  | 0.35697200  | -0.54008600 |
| C | 4.36009400  | -1.38982100 | 1.93959100  |
| C | 5.55424500  | -0.42578000 | 1.94693500  |
| C | 4.71508300  | -2.79609300 | 2.44002600  |
| C | 5.08564400  | -2.83980600 | 3.92530900  |
| C | 5.28363300  | -4.25726900 | 4.46653600  |
| H | 3.95569900  | -2.30109500 | 0.04126200  |
| H | 3.76472000  | -5.23754400 | 3.49717400  |
| H | 4.16051300  | -5.91173100 | 4.91911900  |
| H | 2.77015500  | 0.81073100  | 1.67863100  |
| H | 2.61363600  | -3.34410500 | -3.42254500 |
| H | 0.39887900  | -2.51143700 | -4.20837900 |
| H | -0.79587500 | -0.78176700 | -2.81231900 |
| H | 3.57617900  | -1.00211300 | 2.60503000  |
| H | 5.25812200  | 0.54824600  | 1.54772000  |
| H | 5.94574500  | -0.27443500 | 2.95755800  |
| H | 6.35807800  | -0.81495900 | 1.31291400  |
| H | 5.53718500  | -3.20554300 | 1.83416800  |
| H | 3.83621100  | -3.42534800 | 2.26566800  |
| H | 4.29029800  | -2.35717900 | 4.50499400  |
| H | 6.00796400  | -2.27274800 | 4.09614300  |
| H | 6.10105900  | -4.74689300 | 3.90667500  |
| H | 5.61538000  | -4.19191800 | 5.50873900  |
| H | -7.10570700 | -1.52771600 | 0.47643000  |
| H | -7.66060000 | -3.21244600 | 0.35319700  |
| H | -6.28451600 | -2.80651100 | 1.40389500  |
| H | -4.06307400 | -1.41520500 | 4.49811500  |
| H | -6.55005900 | 2.22826000  | 1.61638900  |
| H | -6.94442800 | 2.65943400  | -1.01386800 |
| H | -5.07390500 | 0.45135300  | -5.46565000 |
| H | -3.29349700 | -1.51797500 | -5.96424100 |
| H | -0.89683300 | -5.18502000 | -3.08715900 |

|   |             |             |             |
|---|-------------|-------------|-------------|
| H | -0.95069000 | -5.88565500 | -0.47231300 |
| H | -2.74174400 | -3.70415300 | 3.89425300  |
| H | 0.07073300  | -1.40612400 | 7.03692600  |
| H | 1.63820900  | -2.21172800 | 6.88306400  |
| H | 1.50800100  | -0.46284600 | 6.65186400  |
| H | 10.10798500 | 1.29357100  | -3.48160400 |
| H | 9.24163600  | 0.50410600  | -4.80675500 |
| H | 8.39055600  | 1.63640900  | -3.75410600 |
| H | 3.03990700  | 1.35364900  | -5.15502900 |
| H | 4.67456300  | 0.90366800  | -5.65559900 |
| H | 5.78563500  | 7.97824400  | -0.77324400 |
| H | 3.98216600  | 2.44446900  | -6.17827300 |
| H | 5.76229700  | 6.83343600  | -2.12332400 |
| H | -2.55418300 | 7.48361800  | 2.31578200  |
| H | 1.48641800  | 1.96372100  | -0.49475900 |
| H | 1.25042200  | 3.79289700  | 0.89603300  |
| H | 0.46228200  | 3.53326000  | 2.47120200  |
| H | 2.07851000  | 2.84858500  | 2.16815100  |
| H | -4.12943900 | 4.96485800  | -0.22857100 |
| H | -2.11748200 | 1.18214800  | -3.07180700 |

## TS6

|   |             |             |             |
|---|-------------|-------------|-------------|
| C | 0.91980000  | -1.23126000 | 6.59639700  |
| C | 0.70090300  | -1.47508500 | 5.11669500  |
| C | -0.04809000 | -0.54859500 | 4.36093100  |
| C | 1.23406900  | -2.65197100 | 4.51448500  |
| C | -0.24762200 | -0.81919700 | 3.01902300  |
| C | 1.09747500  | -2.84992100 | 3.10343600  |
| C | 0.34136400  | -1.92348100 | 2.40434800  |
| H | -0.48071800 | 0.32575500  | 4.83935400  |
| H | 1.81724500  | -3.35027600 | 5.10713000  |
| H | -0.84045000 | -0.16489400 | 2.38809800  |
| H | 1.52361600  | -3.72098200 | 2.61852100  |
| H | 0.16472800  | -2.03346300 | 1.34030900  |
| C | 5.61642500  | 7.02799200  | -0.97618300 |
| C | 4.21961600  | 6.48526000  | -0.52078000 |
| H | 6.42753100  | 6.44941700  | -0.52367700 |
| H | 4.09182900  | 5.43874200  | -0.81370000 |
| H | 4.11398900  | 6.54676000  | 0.56738000  |
| H | 3.40648700  | 7.06032900  | -0.97318700 |
| N | -1.87497400 | 7.29637800  | 2.77870100  |
| C | -0.68140300 | 7.15712200  | 1.85305000  |
| C | -0.95051100 | 6.07394400  | 0.83819100  |

|   |             |             |             |
|---|-------------|-------------|-------------|
| O | -0.70952700 | 6.21107700  | -0.35187400 |
| C | 0.65180800  | 6.97037400  | 2.51317100  |
| O | 0.73481700  | 7.81593100  | 3.65858300  |
| H | -1.67613600 | 8.09080800  | 3.38364200  |
| H | -0.59413400 | 8.05976200  | 1.23348900  |
| H | 0.81827600  | 5.92024300  | 2.79831200  |
| H | 1.44415600  | 7.25662300  | 1.81889500  |
| H | 0.26732900  | 7.36423700  | 4.37237100  |
| N | -1.70469600 | 5.01151900  | 1.22182000  |
| C | -2.21408300 | 3.99090200  | 0.30732500  |
| C | -3.22771600 | 4.47997900  | -0.69662500 |
| O | -3.01172700 | 4.34107400  | -1.92904900 |
| C | -2.69910900 | 2.81483900  | 1.10572800  |
| H | -2.06626300 | 5.03081000  | 2.16887800  |
| H | -1.36835400 | 3.67017300  | -0.30652300 |
| H | -2.93140300 | 1.97083000  | 0.45388100  |
| H | -1.92059900 | 2.47948500  | 1.79300400  |
| H | -3.59923700 | 3.05361300  | 1.68460600  |
| C | -1.61575200 | 1.88608400  | -3.73378300 |
| H | -2.15667200 | 2.12445700  | -4.65253300 |
| H | -0.56842300 | 1.69092300  | -3.97650700 |
| H | -1.69487700 | 2.72875300  | -3.04613000 |
| C | -6.73346600 | -2.58026000 | 0.43615400  |
| S | -5.60687400 | -2.94097400 | -0.95293800 |
| C | 9.24364400  | 0.94946900  | -3.51605600 |
| C | 8.86832800  | -0.19681200 | -2.57614000 |
| C | 7.53952200  | -0.65212600 | -2.45173900 |
| C | 9.88158100  | -0.91467200 | -1.98796000 |
| C | 7.28442700  | -1.74969800 | -1.66503400 |
| C | 9.63059600  | -1.99444500 | -1.11431600 |
| C | 8.32649500  | -2.43834700 | -0.99092900 |
| H | 6.73283800  | -0.12607800 | -2.95422400 |
| H | 10.90843900 | -0.58493400 | -2.12827600 |
| H | 6.26250100  | -2.10648300 | -1.55895300 |
| H | 10.45054400 | -2.50027800 | -0.61497000 |
| H | 8.08276400  | -3.28970500 | -0.36222500 |
| C | 4.15922000  | 1.74393900  | -5.20802600 |
| C | 4.69852500  | 2.45352800  | -3.95271800 |
| H | 3.96844900  | 3.16505000  | -3.55428100 |
| H | 4.92533500  | 1.73502300  | -3.15743800 |
| H | 5.61711500  | 3.00773800  | -4.17250400 |
| N | -2.58097700 | -3.10680700 | -1.07223400 |
| N | -3.87168100 | -1.16312000 | -2.68739200 |
| N | -3.66993300 | -1.92537100 | 1.25193800  |

|    |             |             |             |
|----|-------------|-------------|-------------|
| C  | -2.38300700 | -4.02601900 | 1.22065600  |
| C  | -2.32123500 | -2.92449200 | -3.51979300 |
| C  | -5.51605100 | 0.71884800  | -2.74065500 |
| C  | -4.93459800 | -0.01930600 | 2.14448800  |
| C  | -2.12317200 | -4.02873100 | -0.14686700 |
| C  | -3.19447000 | -1.84289800 | -3.68940600 |
| C  | -5.58347800 | 0.82081700  | -1.32763500 |
| C  | -4.17299100 | -1.16186400 | 2.29188100  |
| O  | -0.74770000 | -0.13739700 | -0.01570800 |
| C  | -1.27283500 | -4.99966600 | -0.79403200 |
| C  | -3.54989700 | -1.30361800 | -4.97838200 |
| C  | -6.33734700 | 1.83313600  | -0.63499800 |
| C  | -3.85567800 | -1.76207700 | 3.56461500  |
| C  | -1.21837200 | -4.66889100 | -2.11212600 |
| C  | -4.46624300 | -0.31906800 | -4.76464900 |
| C  | -6.16037200 | 1.64518300  | 0.70716000  |
| C  | -3.18124300 | -2.91091600 | 3.29794500  |
| C  | -2.05342800 | -3.50575200 | -2.28738900 |
| C  | -4.67318900 | -0.22331700 | -3.34165000 |
| C  | -5.29846200 | 0.50473400  | 0.87958400  |
| C  | -3.06685900 | -3.00649400 | 1.86302900  |
| N  | -4.93531200 | 0.01565700  | -0.37683600 |
| Fe | -3.88674100 | -1.63251600 | -0.72735600 |
| H  | -1.95025000 | -4.81416900 | 1.82490400  |
| H  | -1.86214500 | -3.35151200 | -4.40311300 |
| H  | -6.07685500 | 1.41422700  | -3.35034300 |
| H  | -5.30305400 | 0.49009600  | 3.02659800  |
| N  | 2.58305400  | -2.38277000 | -1.85097500 |
| C  | 0.88450000  | 2.60603600  | 1.70937500  |
| O  | 0.48274600  | 2.13629600  | 0.41910100  |
| N  | 3.43529000  | -1.67308100 | 0.55425700  |
| C  | 0.83228700  | 0.89340400  | 0.05687900  |
| N  | 4.10493000  | -4.83246800 | 4.62154300  |
| C  | 1.93889800  | 0.21833300  | 0.63711700  |
| C  | 2.45164900  | -0.91234500 | 0.03970800  |
| C  | 1.91841100  | -1.37528400 | -1.26320700 |
| C  | 0.80528500  | -0.73648900 | -1.83446000 |
| C  | 2.16313300  | -2.79256000 | -3.05130300 |
| C  | 1.08587500  | -2.20905900 | -3.71603500 |
| C  | 0.40058200  | -1.16550400 | -3.09621900 |
| C  | 0.06823000  | 0.32628000  | -1.06029300 |
| C  | 4.11014800  | -1.42932400 | 1.82158400  |
| C  | 5.22936400  | -0.39301600 | 1.65612200  |
| C  | 4.59775400  | -2.76605600 | 2.39282600  |

|   |             |             |             |
|---|-------------|-------------|-------------|
| C | 5.03611300  | -2.66844500 | 3.85727700  |
| C | 5.32698000  | -4.02632600 | 4.50010300  |
| H | 3.73384900  | -2.43195500 | -0.04890600 |
| H | 3.81190400  | -5.16062600 | 3.70498800  |
| H | 4.29703500  | -5.66846000 | 5.16743000  |
| H | 2.33924800  | 0.55660600  | 1.58061000  |
| H | 2.71628200  | -3.61385300 | -3.50082800 |
| H | 0.78723100  | -2.57042200 | -4.69428600 |
| H | -0.45177400 | -0.70043500 | -3.57636800 |
| H | 3.34998900  | -1.04477500 | 2.51169700  |
| H | 4.83630300  | 0.52710400  | 1.21502800  |
| H | 5.68135800  | -0.14224600 | 2.62002900  |
| H | 6.01286300  | -0.77611800 | 0.99382500  |
| H | 5.42146100  | -3.15441600 | 1.77593100  |
| H | 3.76617600  | -3.47210600 | 2.30758200  |
| H | 4.24223100  | -2.18044000 | 4.43427100  |
| H | 5.93437500  | -2.04520400 | 3.93678100  |
| H | 6.13590900  | -4.52797100 | 3.93845700  |
| H | 5.70915300  | -3.85848200 | 5.51299500  |
| H | -7.06760000 | -1.54147000 | 0.41691900  |
| H | -7.60104100 | -3.23471800 | 0.31663500  |
| H | -6.26068100 | -2.78923700 | 1.39726000  |
| H | -4.12275300 | -1.34176400 | 4.52452900  |
| H | -6.58234600 | 2.22167300  | 1.51994500  |
| H | -6.92701900 | 2.59573400  | -1.12634700 |
| H | -4.95828200 | 0.30803800  | -5.49577800 |
| H | -3.14812100 | -1.65224700 | -5.92031800 |
| H | -0.67491300 | -5.15792100 | -2.90885100 |
| H | -0.78156300 | -5.81736000 | -0.28407500 |
| H | -2.76081500 | -3.62483500 | 3.99250900  |
| H | 1.46148400  | -0.29363100 | 6.76964800  |
| H | -0.03163600 | -1.15379500 | 7.13569600  |
| H | 1.49846600  | -2.03826500 | 7.05323700  |
| H | 10.17908000 | 1.42222600  | -3.20647900 |
| H | 9.37637100  | 0.58156500  | -4.53997000 |
| H | 8.46403900  | 1.71711400  | -3.54345400 |
| H | 3.24587000  | 1.18415300  | -4.98186100 |
| H | 4.89195300  | 1.03611100  | -5.60944800 |
| H | 5.74366900  | 8.07471400  | -0.68400000 |
| H | 3.92238600  | 2.46266000  | -5.99868000 |
| H | 5.72219400  | 6.96536800  | -2.06331000 |
| H | -2.66596100 | 7.56739900  | 2.20012500  |
| H | -0.39554000 | 1.06196400  | -1.72338400 |
| H | 1.96360100  | 2.79152200  | 1.73762300  |

|   |             |            |             |
|---|-------------|------------|-------------|
| H | 0.34698600  | 3.54173900 | 1.85671600  |
| H | 0.61128400  | 1.88780800 | 2.48811900  |
| H | -4.15422300 | 4.96065800 | -0.32698200 |
| H | -2.06960900 | 1.00220000 | -3.28135600 |

### IM3

|   |             |             |             |
|---|-------------|-------------|-------------|
| C | 0.92129800  | -1.28373100 | 6.57480600  |
| C | 0.69701700  | -1.51657900 | 5.09414200  |
| C | -0.05405700 | -0.58412400 | 4.34783800  |
| C | 1.22730400  | -2.68934600 | 4.48144800  |
| C | -0.25850400 | -0.84476900 | 3.00470000  |
| C | 1.08559700  | -2.87687400 | 3.06948000  |
| C | 0.32760600  | -1.94487900 | 2.37987500  |
| H | -0.48198900 | 0.28882700  | 4.83239700  |
| H | 1.81627300  | -3.38967900 | 5.06613700  |
| H | -0.85991700 | -0.17999600 | 2.39360700  |
| H | 1.51564500  | -3.73888100 | 2.57284700  |
| H | 0.16303300  | -2.05770200 | 1.31457000  |
| C | 5.59635200  | 7.02790500  | -0.95367900 |
| C | 4.20081800  | 6.48270200  | -0.49731900 |
| H | 6.40813500  | 6.43330600  | -0.52369200 |
| H | 4.06278000  | 5.44442300  | -0.81326000 |
| H | 4.10678300  | 6.51841200  | 0.59300600  |
| H | 3.38688800  | 7.07376300  | -0.92728200 |
| N | -1.88155300 | 7.27333600  | 2.82956600  |
| C | -0.69135000 | 7.14013800  | 1.89870100  |
| C | -0.96473100 | 6.06458600  | 0.87689800  |
| O | -0.72786900 | 6.21028400  | -0.31297700 |
| C | 0.64406800  | 6.94775000  | 2.55271300  |
| O | 0.73166100  | 7.78484500  | 3.70398500  |
| H | -1.66878100 | 8.04957000  | 3.45322800  |
| H | -0.60588200 | 8.04722900  | 1.28542800  |
| H | 0.81144700  | 5.89596100  | 2.82926000  |
| H | 1.43357200  | 7.23784800  | 1.85673900  |
| H | 0.29501900  | 7.31516400  | 4.42537500  |
| N | -1.71822800 | 4.99983700  | 1.25540500  |
| C | -2.23149100 | 3.98625500  | 0.33527100  |
| C | -3.24835700 | 4.48328800  | -0.66147700 |
| O | -3.03681600 | 4.35328200  | -1.89564100 |
| C | -2.71443600 | 2.80467100  | 1.12675400  |
| H | -2.07357300 | 5.01170700  | 2.20483400  |
| H | -1.38570200 | 3.66775400  | -0.28151600 |
| H | -3.00971300 | 1.98892400  | 0.46423000  |

|   |             |             |             |
|---|-------------|-------------|-------------|
| H | -1.91439500 | 2.43124400  | 1.76825000  |
| H | -3.57981000 | 3.05402900  | 1.75248600  |
| C | -1.64878500 | 1.91072800  | -3.72323200 |
| H | -2.25239500 | 2.14206500  | -4.60348600 |
| H | -0.61055700 | 1.76615600  | -4.03232100 |
| H | -1.72288600 | 2.73862000  | -3.01687300 |
| C | -6.76331600 | -2.60759600 | 0.45230800  |
| S | -5.65919700 | -2.95089500 | -0.95938200 |
| C | 9.21071700  | 0.96594500  | -3.55081400 |
| C | 8.83800100  | -0.18696100 | -2.61799300 |
| C | 7.50935500  | -0.64236600 | -2.49222500 |
| C | 9.85287200  | -0.90972500 | -2.03867500 |
| C | 7.25634700  | -1.74551600 | -1.71267900 |
| C | 9.60429300  | -1.99571500 | -1.17207700 |
| C | 8.30035500  | -2.43971600 | -1.04732800 |
| H | 6.70084900  | -0.11084600 | -2.98591700 |
| H | 10.87940900 | -0.57912600 | -2.17966700 |
| H | 6.23407800  | -2.09859500 | -1.59913400 |
| H | 10.42570800 | -2.50521400 | -0.67882100 |
| H | 8.05766500  | -3.29415000 | -0.42246000 |
| C | 4.12084700  | 1.77587500  | -5.21891100 |
| C | 4.66503700  | 2.47592300  | -3.96035800 |
| H | 3.93884900  | 3.18829600  | -3.55651800 |
| H | 4.88909400  | 1.75216400  | -3.16928400 |
| H | 5.58586600  | 3.02705400  | -4.17853300 |
| N | -2.61090400 | -3.09853800 | -1.09407500 |
| N | -3.91430600 | -1.15367600 | -2.69084000 |
| N | -3.69181900 | -1.93797000 | 1.23867600  |
| C | -2.40226400 | -4.03703500 | 1.19047200  |
| C | -2.35655500 | -2.90085700 | -3.54197400 |
| C | -5.54628700 | 0.73862000  | -2.72487600 |
| C | -4.94803400 | -0.03564700 | 2.15264200  |
| C | -2.14837800 | -4.02966000 | -0.17761900 |
| C | -3.23320400 | -1.82028100 | -3.70038200 |
| C | -5.61230900 | 0.82799900  | -1.31142200 |
| C | -4.18879900 | -1.18067100 | 2.28837300  |
| O | -0.37641000 | 0.20513000  | 0.07220800  |
| C | -1.29796100 | -4.99284200 | -0.83426400 |
| C | -3.58534900 | -1.26481800 | -4.98303900 |
| C | -6.35567300 | 1.84032500  | -0.60865000 |
| C | -3.86426800 | -1.78855300 | 3.55473000  |
| C | -1.24710400 | -4.65137600 | -2.14974700 |
| C | -4.50033500 | -0.28132300 | -4.75946500 |
| C | -6.17429000 | 1.64184900  | 0.73145800  |

|    |             |             |             |
|----|-------------|-------------|-------------|
| C  | -3.19229500 | -2.93643000 | 3.27742400  |
| C  | -2.08428300 | -3.48930500 | -2.31464500 |
| C  | -4.71040500 | -0.20257100 | -3.33612700 |
| C  | -5.31997000 | 0.49481100  | 0.89280400  |
| C  | -3.08610600 | -3.02384600 | 1.84214700  |
| N  | -4.96584200 | 0.01017200  | -0.36932400 |
| Fe | -3.94077400 | -1.64629400 | -0.73914000 |
| H  | -1.96555300 | -4.82844000 | 1.78744300  |
| H  | -1.89554900 | -3.31753100 | -4.42906700 |
| H  | -6.10282600 | 1.44370500  | -3.32732200 |
| H  | -5.30891000 | 0.47028600  | 3.03979500  |
| N  | 2.53202900  | -2.47706000 | -1.79524000 |
| C  | 0.91648300  | 2.63765700  | 1.71180800  |
| O  | 0.76308800  | 2.27779200  | 0.34044500  |
| N  | 3.47887100  | -1.73663900 | 0.56763000  |
| C  | 0.89635700  | 0.92968900  | 0.06527300  |
| N  | 4.09160900  | -4.83958300 | 4.68578500  |
| C  | 2.06505600  | 0.22528400  | 0.60885000  |
| C  | 2.51443900  | -0.92942100 | 0.04218800  |
| C  | 1.95361600  | -1.39519000 | -1.24585200 |
| C  | 0.90471900  | -0.69070700 | -1.87359700 |
| C  | 2.10419700  | -2.88480600 | -2.99280600 |
| C  | 1.09800100  | -2.23620200 | -3.70639900 |
| C  | 0.49184100  | -1.12056000 | -3.13359700 |
| C  | 0.28802500  | 0.46941100  | -1.19208600 |
| C  | 4.16083000  | -1.48179200 | 1.82292300  |
| C  | 5.30451300  | -0.47195100 | 1.64846000  |
| C  | 4.62103600  | -2.81453900 | 2.42687100  |
| C  | 5.05207100  | -2.69809700 | 3.89208900  |
| C  | 5.32322800  | -4.04732000 | 4.56073900  |
| H  | 3.76160400  | -2.50468700 | -0.02625800 |
| H  | 3.79445000  | -5.16240800 | 3.76854700  |
| H  | 4.27726200  | -5.67916600 | 5.22870100  |
| H  | 2.50696000  | 0.59663600  | 1.52169100  |
| H  | 2.59397500  | -3.76546500 | -3.40271800 |
| H  | 0.79096300  | -2.60303600 | -4.67971400 |
| H  | -0.30932500 | -0.59994600 | -3.64523700 |
| H  | 3.41029700  | -1.06464100 | 2.50699600  |
| H  | 4.93604800  | 0.44286000  | 1.17635600  |
| H  | 5.75114500  | -0.20185500 | 2.61030700  |
| H  | 6.08797500  | -0.88791500 | 1.00605200  |
| H  | 5.44177400  | -3.23101100 | 1.82416600  |
| H  | 3.77748400  | -3.50716400 | 2.34765200  |
| H  | 4.26184600  | -2.18918000 | 4.45613700  |

|   |             |             |             |
|---|-------------|-------------|-------------|
| H | 5.95735000  | -2.08445900 | 3.96671500  |
| H | 6.13003900  | -4.56754800 | 4.01315800  |
| H | 5.69974000  | -3.86798800 | 5.57396300  |
| H | -7.09068900 | -1.56651400 | 0.45564500  |
| H | -7.63696100 | -3.25407500 | 0.33421300  |
| H | -6.27774200 | -2.83655200 | 1.40237500  |
| H | -4.12418500 | -1.37327800 | 4.51871200  |
| H | -6.58714600 | 2.21694000  | 1.54978300  |
| H | -6.94094200 | 2.61127400  | -1.09201200 |
| H | -4.98861200 | 0.35629500  | -5.48393600 |
| H | -3.18055000 | -1.60125900 | -5.92802300 |
| H | -0.70312600 | -5.13210300 | -2.95093700 |
| H | -0.80231300 | -5.81235400 | -0.33177300 |
| H | -2.76718000 | -3.65382300 | 3.96540800  |
| H | 1.44758700  | -0.33856400 | 6.75315400  |
| H | -0.02777700 | -1.22857400 | 7.12110300  |
| H | 1.51712100  | -2.08509200 | 7.01910800  |
| H | 10.15138800 | 1.43103300  | -3.24546400 |
| H | 9.33204400  | 0.60709300  | -4.57939400 |
| H | 8.43491000  | 1.73785000  | -3.56378800 |
| H | 3.20630700  | 1.21740700  | -4.99375700 |
| H | 4.85013400  | 1.06777700  | -5.62617000 |
| H | 5.73364100  | 8.06646500  | -0.63762000 |
| H | 3.88449700  | 2.49984400  | -6.00503000 |
| H | 5.69106700  | 6.99098300  | -2.04307200 |
| H | -2.66905100 | 7.57065300  | 2.25924300  |
| H | -0.22972900 | 1.19208100  | -1.81277300 |
| H | 1.97500200  | 2.72617400  | 1.98550700  |
| H | 0.43319200  | 3.60808900  | 1.82771200  |
| H | 0.43610300  | 1.91144200  | 2.37677900  |
| H | -4.17193300 | 4.96442600  | -0.28521000 |
| H | -2.03864900 | 0.99886800  | -3.26549000 |
